1 **The development of individual differences in cooperative behaviour: maternal**  
2 **glucocorticoid hormones alter helping behaviour of offspring in wild meerkats**

3

4 Ben Dantzer<sup>1,2,3\*</sup>, Constance Dubuc<sup>1,2</sup>, Ines Braga Goncalves<sup>2,4</sup>, Dominic L. Cram<sup>1,2</sup>,  
5 Nigel C. Bennett<sup>5</sup>, Andre Ganswindt<sup>5,6</sup>, Michael Heistermann<sup>7</sup>, Chris Duncan<sup>2</sup>, David  
6 Gaynor<sup>2,5</sup>, Tim H. Clutton-Brock<sup>1,2,5</sup>

7 <sup>1</sup>Department of Zoology, University of Cambridge, Cambridge, United Kingdom

8 <sup>2</sup>Kalahari Meerkat Project, Kuruman River Reserve, Northern Cape, South Africa

9 <sup>3</sup>Department of Psychology, Department of Ecology and Evolutionary Biology,  
10 University of Michigan, Ann Arbor, MI 48109, USA

11 <sup>4</sup>Department of Evolutionary Biology and Environmental Studies, Animal Behaviour,  
12 University of Zurich, Switzerland

13 <sup>5</sup>Mammal Research Institute, Department of Zoology and Entomology, University of  
14 Pretoria, Pretoria, South Africa

15 <sup>6</sup>Endocrine Research Laboratory, Department of Anatomy and Physiology, University of  
16 Pretoria, 0110, Onderstepoort, South Africa

17 <sup>7</sup>Endocrinology Laboratory, German Primate Center, Leibniz Institute for Primate  
18 Research, Kellnerweg 4, D-37077 Göttingen, Germany

19

20

21 \*Corresponding Author: [dantzer@umich.edu](mailto:dantzer@umich.edu)

22 **Abstract**

23 The phenotype of parents can have long-lasting effects on the development of offspring  
24 as well as on their behaviour, physiology, and morphology as adults. In some cases,  
25 these changes may increase offspring fitness but, in others, they can elevate parental  
26 fitness at a cost to the fitness of their offspring. We show that in Kalahari meerkats  
27 (*Suricata suricatta*), the circulating glucocorticoid (GC) hormones of pregnant females  
28 affect the growth and cooperative behaviour of their offspring. We performed a 3-year  
29 experiment in wild meerkats to test the hypothesis that GC-mediated maternal effects  
30 reduce the potential for offspring to reproduce directly and therefore cause them to  
31 exhibit more cooperative behaviour. Daughters (but not sons) born to mothers treated  
32 with cortisol during pregnancy grew more slowly early in life and exhibited significantly  
33 more of two types of cooperative behaviour (pup rearing and feeding) once they were  
34 adults compared to offspring from control mothers. They also had lower measures of  
35 GCs as they aged, which could explain the observed increases in cooperative  
36 behaviour. Because early life growth is a crucial determinant of fitness in female  
37 meerkats, our results indicate that GC-mediated maternal effects may reduce the fitness  
38 of offspring, but may elevate parental fitness as a consequence of increasing the  
39 cooperative behaviour of their daughters.

40

41 **Keywords:** Cooperation, Early life adversity, Glucocorticoids, Growth, Maternal stress

## 42 **Introduction**

43           Parental effects are a mechanism of trans-generational phenotypic plasticity that  
44 occurs when the parental phenotype or parental environment modifies offspring  
45 characteristics (1). Parental effects can increase the survival or reproduction of  
46 offspring, thereby elevating the direct fitness of both offspring and parents (2-6).  
47 Alternatively, parental effects can increase parental fitness, but at some cost to the  
48 fitness of their offspring (7-8) – a process regarded as a type of parental manipulation  
49 (9-12) or ‘selfish parental effect’ (13). For example, in mammals, the optimal birth weight  
50 or litter size often differs between mothers and offspring (14) and pregnant females  
51 experiencing stressful environments may reallocate resources away from offspring and  
52 towards themselves, so that their offspring are smaller or grow more slowly before  
53 weaning (15). Despite these observations, it has been suggested that selfish parental  
54 effects may be rare and unstable because selection would be expected to favour the  
55 evolution of resistance mechanisms in offspring (7, 11, 13, 16, 17).

56           Selfish parental effects may in fact be more likely in cooperatively breeding  
57 species where philopatric offspring (subordinates) help to rear the subsequent offspring  
58 of their parents or other close relatives. This could be especially likely under low food or  
59 high stress conditions as parents may gain substantial direct fitness benefits from  
60 delaying the development of their offspring if this causes them to invest in alloparental  
61 care directed at the parent’s subsequent offspring (9-10). In addition, the costs of selfish  
62 parental effects to offspring could be reduced in these circumstances, as offspring will  
63 gain indirect fitness benefits by contributing to raising the subsequent offspring of their  
64 parents (18). For example, laboratory studies of eusocial insects suggest the possibility

65 that selection will favour the evolution of alleles that enable mothers to increase the  
66 helping behaviour of their offspring while simultaneously reducing their capabilities of  
67 reproducing on their own (19-20; but see 21).

68 To date, empirical field tests of how parental effects shape the helping behaviour  
69 of offspring are rare (23) and studies of selfish parental effects have mostly focused on  
70 non-social species (13, 24). Here, we report the results of experiments designed to test  
71 the hypothesis that elevated maternal glucocorticoid levels (GCs) reduce the potential  
72 for offspring to have direct reproductive opportunities and causes them to exhibit more  
73 cooperative behaviour. In a 3-year field study, we experimentally elevated maternal  
74 GCs by treating pregnant dominant female meerkats with cortisol and tracking the  
75 growth, stress physiology, and cooperative behaviour of their offspring from birth until  
76 ~18 months of age, compared to those from control litters. We manipulated maternal  
77 GCs because they are known to cause mothers to reallocate energy away from  
78 offspring and towards themselves (15), indicating that they may function as a mediator  
79 of selfish maternal effects. Changes in maternal GCs have also previously been shown  
80 to delay the dispersal of offspring as well as influence the parental care behaviour of  
81 offspring (25-26), both traits that are important in cooperative breeders where philopatric  
82 offspring exhibit alloparental care behaviour towards juveniles.

83 To identify if the exposure of mothers to heightened GCs reduced reproductive  
84 success of their offspring, we examined if offspring from mothers treated with cortisol  
85 during pregnancy grew more slowly early in life. In meerkats, the rate of early life growth  
86 and body mass is closely linked to future direct fitness through its effects on survival,  
87 foraging success, adult body mass (27-29), as well as the probability of acquiring

88 dominance (30-31) and other direct reproductive opportunities (32). As elevated  
89 exposure to maternal GCs in some mammals may reduce offspring size and growth  
90 early in life (15), we predicted that offspring from mothers treated with cortisol during  
91 pregnancy would be smaller or grow more slowly early in life. Because the rate of early  
92 life growth is predictive of future direct fitness in meerkats (27-32), we predicted that if  
93 offspring from mothers treated with cortisol did grow more slowly, they would  
94 consequently invest more in indirect fitness opportunities by contributing more to  
95 cooperative activities than controls.

96       Secondly, we determined if offspring from mothers treated with cortisol during  
97 pregnancy subsequently increased their contributions to two types of cooperative  
98 behaviours: pup rearing (“babysitting”: 33) and food provisioning during the period when  
99 the pups are foraging with their natal group, but are not yet nutritionally independent  
100 (“pup feeding”: 34). We chose these two behaviours as they appear to be most costly  
101 from an energetic perspective (35) and are most closely tied to the probability of parents  
102 successfully rearing offspring. If offspring from mothers treated with cortisol during  
103 pregnancy exhibit more of either of these two types of alloparental care, this should  
104 increase both parental direct fitness (the number of offspring that they subsequently  
105 produce) and the indirect fitness of offspring, because subsequent offspring that receive  
106 more alloparental care should grow faster or have higher early life survival (27, 32, 36,  
107 37). Previous studies in meerkats show that offspring with more helpers or those that  
108 receive more alloparental care grow faster or have early life survival (27, 32, 36, 37).

109       To assess the mechanism by which elevated exposure to maternal stress may  
110 affect the alloparental care behaviour of offspring, we repeatedly measured plasma

111 cortisol and faecal glucocorticoid metabolite (fGCM) concentrations of offspring from  
112 when they were approximately 1 to 18 months of age to identify how our manipulations  
113 affected their neuroendocrine stress axes (GC output). Elevated maternal GCs can  
114 cause long-term changes in the neuroendocrine stress axis of offspring (38) and  
115 elevated activity of the neuroendocrine stress axis in meerkats can reduce their  
116 contributions to alloparental care (39). We therefore predicted that if offspring born to  
117 mothers treated with cortisol during pregnancy exhibited more alloparental care  
118 behaviour compared to controls, they would also have reduced plasma cortisol and  
119 fGCM concentrations.

120

## 121 **Methods**

### 122 *Study site & basic data collection*

123 We studied free-living meerkats at the Kuruman River Reserve (26° 58' S, 21°  
124 49' E) in the Northern Cape, South Africa from 2014-2017. Individuals were marked  
125 uniquely with PIT tags (Identipet<sup>®</sup>, Johannesburg, South Africa) as well as dye marks so  
126 that they could be identified. Groups were visited for ~4-8 hours per day ~4-6 times per  
127 week throughout each year of study and sometimes more frequently such as when  
128 there were pups being babysat. Groups were visited at sunrise before meerkats  
129 emerged from their sleeping burrow. After all the meerkats had emerged, but prior to  
130 when they started going foraging, we counted the total number of meerkats in the group  
131 (to get estimates of group size) and recorded which individuals were present (using their  
132 unique combinations of dye marks). We recorded their body mass on a portable  
133 balance each morning before foraging, 2-4 hrs after foraging was initiated, and

134 immediately prior to when foraging ended (40). These measures of body mass provided  
135 our estimates of growth, body mass, and foraging success that are used in our analyses  
136 described below.

### 137 *Experimental manipulations of dominant females*

138 Dominant females in each group were identified via behavioural observations  
139 (41). The pregnancy status of dominant females was determined visually (distended  
140 abdomen) as well as noting a constant increase in their body mass. Dominant females  
141 were treated with either a cortisol solution or a control oil vehicle when they were  
142 pregnant by feeding them food containing one of these two treatments. We initially  
143 offered experimental animals hard boiled eggs with added cortisol but found that they  
144 rejected all foods that contained added cortisol with the exception of scorpions. We  
145 consequently fed experimental females with cortisol (10 mg/kg of hydrocortisone, Sigma  
146 H4126), that were dissolved in 100 µl of 100% coconut oil and injected into a dead  
147 scorpion (*Opisthophthalmus* spp.). Control females were fed a dead scorpion that was  
148 injected with 100 µl of 100% coconut oil. A previous study using the same protocol  
149 showed that meerkats that were fed cortisol had significantly higher plasma cortisol and  
150 fGCM concentrations than control animals and these increases were within a  
151 biologically relevant range (39). This indicated that our treatment causes the exogenous  
152 glucocorticoids that we feed the meerkats to enter their bloodstream and leads to  
153 sustained increases in their circulating glucocorticoid concentrations.

154 Females were randomly allocated to the treatments. Across the three years of  
155 this study, we produced a total of 13 cortisol-treated litters from 10 females and 7  
156 control litters produced by 6 females (Table 1). Three of the females experienced both

157 the control and cortisol treatments at different time points of the experiment, whereas  
158 one female experienced the control treatment once and the cortisol treatments twice.  
159 For these latter females treated twice, the order of treatments was randomly selected.  
160 We conducted these experiments over the course of three years: 13 litters from 10  
161 females in 2014 (April-December 2014, 3 litters aborted), 5 litters from 5 females in  
162 2015 (February-July 2015, 1 litter aborted), and 3 litters from 3 females in 2016 (July  
163 2016). Three cortisol-treated mothers and one control mother aborted their offspring  
164 prior to birth and were excluded from any analyses except for assessing differences in  
165 the frequency of abortion between control and cortisol-treated mothers (Table 2). This  
166 provided final sample sizes of 31 pups from 10 litters from 9 cortisol-treated females  
167 and 25 pups from 6 litters from 6 control females (Table 1).

168 We aimed to experimentally increase the glucocorticoid concentrations of  
169 pregnant dominant females from when they were first confirmed to be pregnant (second  
170 half of gestation) until parturition. Gestation in meerkats is ~70 days so we aimed to  
171 treat them with glucocorticoids from approximately 35-70 d during gestation. In reality,  
172 females that successfully produced a litter where pups emerged from the natal burrow  
173 were treated with cortisol for 12-36 days prior to birth (n=10 litters from 9 females, mean  
174 = 23.7 d, median = 23.5 d), whereas controls were fed for 12-58 d prior to birth (n=6  
175 litters from 6 females, mean = 30 d, median = 20.5 d). Although controls were treated  
176 for slightly longer, there was no significant difference in treatment duration between  
177 control and cortisol-treated females (general linear model,  $t = 1.05$ ,  $P = 0.31$ ).

178 To provide an additional comparison group to investigate how our treatments (fed  
179 during pregnancy or fed cortisol during pregnancy) affected offspring survival, growth,



180 and cooperative behaviour, we also monitored these traits in offspring produced by  
181 dominant females that were untreated during pregnancy (n = 52 litters from 21 dominant  
182 females, Table 1). These females were not fed or treated with cortisol (hereafter,  
183 “untreated mothers”). For our analyses of how the treatments affected offspring survival  
184 and growth, the untreated offspring were those from litters produced by dominant  
185 females in other meerkat groups in our same study area and were born during our  
186 study. We assessed the contributions of offspring from mothers treated with cortisol  
187 during pregnancy to two cooperative behaviours (babysitting and pup feeding)  
188 compared to those from control mothers, but also to other group members from  
189 untreated mothers. We did not have data from offspring from untreated mothers when  
190 we assessed how our treatments affected their plasma cortisol or fGCM concentrations.

#### 191 *Quantifying early life growth of offspring*

192 Meerkat pups typically first emerge from their natal burrow approximately 21-30 d  
193 after birth. Meerkat groups and dominant females were monitored daily around the  
194 estimated date of parturition and birth dates were estimated according to the change in  
195 the physical appearance of the dominant female, a large drop in body mass overnight,  
196 and group members exhibiting babysitting behaviour at the sleeping burrow. Burrows  
197 containing pups were monitored each day and, when pups emerged, they were uniquely  
198 marked by trimming small sections of hair before permanent PIT tags could be applied.  
199 Pups were weighed each time we visited the groups on a portable balance in the  
200 morning after group members emerged from their sleeping burrow (as above).

#### 201 *Quantifying cooperative behaviour of offspring*

202           We measured the babysitting (controls: 195-655 d; cortisol: 184-655 d; untreated:  
203 155-655 d) and pup feeding (controls: 220-635 d; cortisol: 184-655 d; untreated: 155-  
204 626 d) contributions of offspring from cortisol-treated and control mothers when they  
205 were >6 months of age until death or disappearance. We visited sleeping burrows  
206 containing pups every day in the morning and recorded the identity of the attending  
207 babysitters. As we have done previously (33, 36, 39, 42), we calculated relative  
208 babysitting contributions of each individual meerkat for each litter by dividing the total  
209 number of days an individual babysat a litter over the total number of days that this  
210 specific litter had a babysitter. Pup feeding behaviour for each pup produced by the  
211 dominant females in the different treatment groups was estimated using *ad libitum*  
212 sampling (34, 39). When the social group contained pups (up to 90 d of age), we  
213 recorded all pup-feeding events from all individuals, which are visually and acoustically  
214 conspicuous to observers (43). We then used these data to estimate the proportion of  
215 pup-feeding events exhibited by an individual relative to all others in the group (i.e.,  
216 relative pup feeding). Because the total amount of time devoted to the *ad libitum*  
217 recording sessions varied, we corrected for variation in observation time (see below).

#### 218           *Quantifying plasma cortisol concentrations from offspring*

219           We obtained plasma samples from offspring from cortisol-treated and control  
220 mothers approximately every 3 months from first emergence from the burrow (~1  
221 month) until ~18 months of age (controls: 20-548 d; cortisol-treated: 25-559 d). Capture  
222 and blood processing procedures are described elsewhere (44-45). The amount of time  
223 it took to obtain the blood samples varied (median = 10.6 min, SD = 7.2 min), but we  
224 included co-variates for sampling time and sampling time<sup>2</sup> to control for effects of

225 sampling time (described in 45). We measured total plasma cortisol concentrations  
226 using a previously validated assay (Coat-a-Count, Siemens Diagnostic Products  
227 Corporation, Los Angeles, USA: validation described in 44). The sensitivity of the assay  
228 was 1.9 ng/ml and cross-reactivity to other hormones was 76% with prednisolone,  
229 11.4% with 11-deoxycortisol, 2.3% with prednisone and <1% with aldosterone,  
230 corticosterone, cortisone, oestriol, estrone and pregnenolone. Intra-assay coefficient of  
231 variation (CV) was 7% (n = 20 samples). Inter-assay CV for a low control (78.5 ± 6.3  
232 ng/ml n = 5 assays) was 8% and 2.8% for a high control (187 ± 5.3 ng/ml, n = 5  
233 assays).

#### 234 *Quantifying fGCM concentrations from offspring*

235 We collected faecal samples from offspring of cortisol-treated and control  
236 mothers opportunistically during behavioural observations over the course of the study  
237 (controls: 25-356 d; cortisol-treated: 32-326 d). Faecal samples were processed as  
238 described previously using a methanol solution to extract fGCMs for analysis (46-47).  
239 Immunoreactive fGCM concentrations were determined using a group-specific enzyme  
240 immunoassay measuring cortisol metabolites with a 5β-3α,11β-diol-structure (11β-  
241 hydroxyetiocholanolone), already validated and established for monitoring fGCM  
242 alterations in meerkats (47). Faecal GCMs measured reflect average adrenal cortisol  
243 production over the previous ~24 to 48 hr period (47). Detailed assay characteristics,  
244 including full descriptions of the assay components and cross-reactivities, are found  
245 elsewhere (48). The sensitivity of the assay was 1.2 ng/g dry weight and intra-assay CV  
246 determined by repeated measurements of high and low value quality controls were

247 6.9% and 7.4% and inter-assay CV values were 11.5% and 15.9% (n = 29 assays),  
248 respectively.

### 249 *Statistical analyses*

250 We used generalized (binomial errors) or linear mixed-effects models (LMMs) to  
251 examine how our treatments affected the probability that the litter was aborted, litter size  
252 and sex ratio at emergence from the burrow, and the proportion of the litter that survived  
253 to emergence from the burrow, independence (~90 d of age: 29), and 6 or 12 months of  
254 age. We focused on addressing whether the offspring from cortisol-treated mothers  
255 differed from control or untreated mothers. These models included a fixed effect for date  
256 of birth of the litter and random intercept terms for dominant female identity and year (as  
257 the experiments were conducted over 3 years). None of the GLMMs were  
258 overdispersed (Table 2).

259 We used a LMM to investigate how the maternal treatments affected offspring  
260 growth from first emergence from their natal burrow (~1 month) to 3 months of age  
261 when the pups are typically foraging independently (29, 34). Morning body mass (in  
262 grams) was the response variable with the fixed effects of maternal treatment (cortisol-  
263 treated, control, or untreated), pup sex, pup age, litter size at burrow emergence, first  
264 measure of body mass when the pups first emerged from the burrow (to control for  
265 possible differences in age or development when they entered our study population),  
266 group size, group size<sup>2</sup>, total rainfall in the previous 60 days, two measures of  
267 seasonality (sine and co-sine functions of day of weight measure: see 40), and two  
268 three-way interactions between sex, treatment, age or age<sup>2</sup>. Group size was defined as  
269 the average number of subordinate meerkats >6 months of age in the group during the

270 entire period of offspring growth. Random intercept terms for year and the identity of the  
271 individual nested in litter, nested in dominant female identity, nested in group were also  
272 included in this model. Fixed and random effects included in these models were based  
273 upon previous studies investigating meerkat body mass and/or growth from 1-3 months  
274 (28, 31, 40). To prevent any issues associated with selective disappearance of specific  
275 individuals, only individuals that survived to 90 d were included in these analyses.

276 We assessed how the treatments affected the relative babysitting and pup  
277 feeding contributions of subordinates when they were >6 months (as they rarely do  
278 alloparental care behaviour when <6 months: 36) from cortisol-treated, control, and  
279 untreated mothers. Relative babysitting and pup feeding contributions are defined as  
280 the proportion of babysitting or pup feeding contributions exhibited by a specific  
281 individual compared to the total number of babysitting or pup feeding contributions for  
282 that litter exhibited by all individuals in the group that were >6 months of age at the time  
283 of the birth of the litter (36, 39, 42). In these generalized linear mixed-effects models  
284 (GLMM, binomial errors), we included a three-way interaction between treatment, sex,  
285 and age of the subordinate to assess if the effects of the treatments on babysitting or  
286 pup feeding varied according to the sex or age of the subordinate, as contributions to  
287 cooperative behaviour in meerkats are known to vary according to subordinate sex and  
288 age (36). To account for differences in observation time, we included a co-variate for the  
289 number of days the litter was babysat (babysitting length) and the number of days the  
290 subordinate was observed in the group during babysitting as well as the total time spent  
291 observing the group during pup feeding (observation time). We included a range of co-  
292 variates (see Tables 4-6) that have been previously documented to affect relative

293 contributions to babysitting and pup feeding, including age, foraging success, body  
294 mass, and group size (34-36, 42, 49; 50). Group size was defined as the average  
295 number of subordinate meerkats >6 months of age in the group while the litter was  
296 being babysat or pup fed. Foraging success was defined as the average weight gained  
297 per hour estimated as the change in body mass from morning weight to evening weight  
298 over the total number of hours that had elapsed since those two weights (45).  
299 Relatedness between the subordinate and the litter being babysat was not included as it  
300 has not been shown to impact babysitting or pup feeding contributions (27, 42) and  
301 nearly all of the litters in our dataset were produced by the mother or full sibling of the  
302 subordinate. Random intercept terms for year and the identity of the individual, and litter  
303 being babysat or pup fed were nested within the group where the litter was being  
304 babysat or pup fed. Overdispersion was not an issue for our GLMM for babysitting as  
305 indicated by the goodness of fit test (Pearson  $\chi^2 = 147.1$ ,  $df = 154$ ,  $P = 0.64$ , using  
306 package aods3: 51) but our GLMM for pup feeding was initially overdispersed (Pearson  
307  $\chi^2 = 310$ ,  $df=165$ ,  $P < 0.0001$ ) so we included an observation level random intercept  
308 term.

309 We used two separate LMMs to assess how our manipulations affected plasma  
310 cortisol and fGCMs in offspring from cortisol-treated and control mothers (we did not  
311 have these data from offspring from untreated mothers). Each model included fixed  
312 effects for maternal treatment, pup sex and age, time of day and year that the sample  
313 was acquired (2014 or 2015), and random intercept terms for identity of individual  
314 nested in their birth litter and group. In the model for plasma cortisol concentrations, we  
315 also included a linear and second order fixed effect for the time it took to acquire the

316 blood sample to control for any variation in plasma cortisol concentrations due to  
317 restraint stress (45). Year was included as a fixed effect because we only had samples  
318 from two separate years. We included covariates associated with the individual meerkat  
319 and weather or social group characteristics that are known to affect plasma cortisol (45)  
320 or fGCM (47) concentrations (see Tables 6-7).

321 We used R (version 3.4.3: 52) for all of our statistical analyses. R package lme4  
322 (version 1.1-14: 53) was used for LMMs and P values were estimated using lmerTest  
323 (version 2.0-33: 54). A graphical approach was used to confirm normality and  
324 homoscedasticity of residuals and to confirm there were no observations with high  
325 leverage (55). Collinearity among predictor variables included in our models was  
326 assessed by calculating variance inflation factors (55) or generalized variance inflation  
327 factors (for variables that had a second order term or those included in an interaction:  
328 56). Collinearity was not a problem as indicated by our variance inflation factors (VIFs)  
329 as VIFs or generalized VIFs were less than ~4 for all variables. In our model for how our  
330 treatments affected offspring growth (Table 3), the generalized VIF for the two  
331 measures of seasonality (sine and co-sine functions of day of weight measure) were <6  
332 but these two variables were included a priori given their previously documented effects  
333 on body mass and growth in meerkats (40). All continuous variables were standardized  
334 to a mean of 0 and SD of 1.

335

## 336 **Results**

337 *Effects of treatments on litter characteristics and offspring survival*

338           There was no evidence that the treatment of pregnant females with cortisol  
339 affected their ability to maintain litters to term or the survival of their pups prior to  
340 emergence from the natal burrow (Tables 1-2). The number of pups surviving to  
341 emergence from the natal burrow or 3, 6, or 12 months of age and the litter sex ratio  
342 were not different among litters from cortisol-treated, control, or untreated females  
343 (Tables 1-2).

#### 344                                           *Effects of treatments on offspring early life growth*

345           The effects of the treatments on offspring growth from initial emergence to  
346 nutritional independence (1-3 months) differed between daughters and sons, as  
347 reflected in the significant three-way interaction between treatment, sex, and age (Table  
348 3). Daughters (but not sons) from cortisol treated mothers grew more slowly from 1-3  
349 months compared to those from control (fed) mothers (daughters: age x treatment,  $t = -$   
350  $4.17$ ,  $P < 0.0001$ ; sons:  $t = -1.48$ ,  $P = 0.14$ ), but exhibited similar growth compared to  
351 those from untreated (unfed) mothers (daughters: age x treatment,  $t = 0.65$ ,  $P = 0.51$ ;  
352 sons:  $t = -0.52$ ,  $P = 0.6$ , Table 3, Fig. 1). Daughters, but not sons, from control (fed)  
353 mothers grew faster than those from untreated mothers (daughters: age x treatment,  $t =$   
354  $-4.24$ ,  $P < 0.0001$ ; sons:  $t = 1.35$ ,  $P = 0.18$ ).

#### 355                                           *Effects of treatments on offspring cooperative behaviour*

356           The effects of the maternal treatments on babysitting behaviour of offspring  
357 depended upon the age and sex of the offspring (Table 4). Babysitting contributions in  
358 daughters from mothers treated with cortisol during pregnancy were slightly, but  
359 significantly higher with increasing age of the babysitter compared to those from control  
360 mothers (age x treatment,  $z = -2.89$ ,  $P = 0.0039$ ) but not untreated mothers (age x



361 treatment,  $z = 1.88$ ,  $P = 0.06$ ; Table 4, Fig. 2). Babysitting contributions in sons from  
362 mothers treated with cortisol during pregnancy showed a similar tendency to slightly  
363 increase with age compared to those from control mothers, but this difference was not  
364 significant (age x treatment,  $z = -1.92$ ,  $P = 0.055$ ). Further, age-related increases in  
365 babysitting contributions between males from mothers treated with cortisol during  
366 pregnancy and untreated mothers did not differ (age x treatment,  $z = -0.03$ ,  $P = 0.97$ ;  
367 Table 4, Fig. 2). Comparisons of the magnitude of effect sizes showed that the  
368 interaction between age and maternal treatment had a larger effect on babysitting  
369 contributions in daughters but not sons than other variables known to impact babysitting  
370 contributions, such as foraging success, age-related body mass, or group size (Table  
371 4).

372 The effects of the maternal treatments on pup feeding depended upon the sex of  
373 the offspring, but not their age (Table 5). Daughters, but not sons from mothers treated  
374 with cortisol during pregnancy exhibited significantly more pup feeding contributions  
375 than those from control mothers (females:  $z = -3.12$ ,  $P = 0.00018$ ; males:  $z = -1.14$ ,  $P =$   
376  $0.25$ ) or untreated mothers (females:  $z = -3.49$ ,  $P = 0.0005$ , sons:  $z = -1.03$ ,  $P = 0.3$ ,  
377 Table 5, Fig. 3). Notably, the magnitude of effect size of maternal treatment for  
378 daughters was much larger than other variables known to impact babysitting  
379 contributions such as foraging success, age-related body mass, and group size (Table  
380 5).

### 381 *Effects of treatments on offspring stress physiology*

382 Daughters from mothers treated with cortisol during pregnancy had lower  
383 plasma cortisol concentrations (age x treatment,  $t = -1.76$ ,  $P = 0.08$ , Table 6, Fig. 4A)

384 and lower fGCM concentrations (age x treatment,  $t = -2.9$ ,  $P = 0.004$ , Table 7, Fig. 5A)  
385 as they became older compared to those from control mothers but these differences  
386 were only significant for fGCM concentrations. Sons from mothers treated with cortisol  
387 during pregnancy had significantly lower plasma cortisol concentrations as they became  
388 older compared to those from control mothers (age x treatment  $t = -2.68$ ,  $P = 0.008$ ,  
389 Table 6, Fig. 4B) but similar fGCM concentrations compared to those from control  
390 mothers as they became older (age x treatment,  $t = -0.1$ ,  $P = 0.49$ , Table 7, Fig. 5B).

391

## 392 **Discussion**

393 We found some support for our hypothesis that elevated maternal GCs would  
394 reduce the potential for offspring to have direct reproductive opportunities and would  
395 therefore shift them towards exhibiting more cooperative behaviour that could increase  
396 their indirect fitness. Daughters, but not sons, from mothers treated with cortisol during  
397 pregnancy grew more slowly early in life and exhibited more babysitting and pup  
398 feeding behaviour as they became older compared to controls. Other than offspring  
399 survival (Table 2), we were unable to quantify the direct and indirect fitness of offspring  
400 from control or cortisol-treated mothers, but early life growth or body mass (which we  
401 measured here) is closely linked to direct fitness opportunities in daughters (27-32).  
402 Previous studies in meerkats show that female, but not male, offspring that grow faster  
403 from 1-3 months are more likely to acquire the dominant breeding position (31), perhaps  
404 because offspring that grow faster in their first 3 months of life are heavier later in life  
405 (32, 57, 58), and heavier females are more likely to acquire a vacant dominant breeding  
406 position (30, 32). As such, daughters, but not sons, from mothers treated with cortisol

407 levels during pregnancy should have reduced future direct fitness opportunities and  
408 therefore increase their investment in behaviours that elevate their indirect fitness. Our  
409 results are consistent with studies in other taxa that suggest that individuals adjust their  
410 contributions to cooperative behaviour according to their future reproductive potential.  
411 For example, in cooperatively breeding birds, when the chances of direct reproduction  
412 are elevated, subordinates often stop helping at the nest (59). Studies of social wasps  
413 show that individuals whose probability of acquiring the dominant breeding position was  
414 experimentally increased exhibited significantly less helping behaviour (60, 61). Finally,  
415 in cooperatively breeding fish, subordinates will reduce their helping investment  
416 immediately prior to dispersal from their natal group where they attempt to reproduce on  
417 their own rather than stay in their natal group and queue for dominance (62).

418         Our results show that increases in maternal GCs can increase the cooperative  
419 behaviour of daughters, which should lead to substantial direct fitness benefits to  
420 mothers. Daughters from mothers treated with cortisol during pregnancy exhibited more  
421 alloparental care compared to controls, such that subsequent offspring produced in  
422 groups with offspring from cortisol-treated mothers should have received more  
423 alloparental care. Because offspring that receive more alloparental care grow faster  
424 early in life or are larger later in life (32, 57), the presence of offspring from cortisol-  
425 treated mothers should increase the direct fitness of dominant breeders and the indirect  
426 fitness of the offspring from cortisol-treated mothers. Taken together, our results  
427 suggest that this GC-mediated maternal effect reduced the direct fitness opportunities of  
428 daughters by reducing their early life growth, but they compensated by increasing their  
429 investment in indirect fitness opportunities (helping to rear non-descendent offspring).

430 This is in line with theoretical predictions that parental manipulation of the cooperative  
431 behaviour of offspring can evolve if the costs of resisting the parental effect are high and  
432 inclusive fitness benefits of helping rear subsequent offspring are increased (18), as is  
433 the case in cooperative breeders.

434 Control females that were fed during pregnancy produced daughters that grew  
435 faster during early development (1-3 months) compared to daughters from cortisol-  
436 treated or untreated mothers. Although mothers that were treated with cortisol during  
437 pregnancy received the same amount of supplemental food as controls, daughters and  
438 sons from mothers fed cortisol during pregnancy did not differ in early life growth  
439 compared to those from untreated mothers. This indicates that the additional food  
440 provided to dominant females during pregnancy had the potential to increase growth,  
441 but the added cortisol prevented those gains in body mass. This has implications for  
442 understanding the fitness consequences of maternal stress on offspring growth  
443 trajectories (15, 63) because our results show that elevated circulating GC levels in  
444 pregnant females in the absence of energetic constraints induced reductions in the early  
445 life growth of offspring. This supports the hypothesis that maternal GC levels during  
446 offspring development act as a cue that induces plasticity in offspring growth rather than  
447 simply mediating the effects of energetic constraints. Alternatively, elevated maternal  
448 GCs could alter patterns of maternal investment in offspring. Identifying whether  
449 offspring or mothers are driving these effects is a major challenge in studies of maternal  
450 stress effects in wild animals.

451 The reductions in the activity of the neuroendocrine stress axis of daughters may  
452 have potentiated the increased alloparental care behaviour that we observed.

453 Compared to daughters from control mothers, daughters from mothers treated with  
454 cortisol during pregnancy exhibited more babysitting as they became older, more overall  
455 pup feeding, and they also had lower plasma cortisol and fGCM concentrations. Males  
456 from mothers treated with cortisol during pregnancy had significantly lower plasma  
457 cortisol concentrations, but not fGCM concentrations as they got older and also tended  
458 to exhibit more babysitting as they aged. The activity of the neuroendocrine stress axis  
459 is closely linked to an array of social behaviours (64) and our recent work shows that  
460 elevated activity of the neuroendocrine stress axis reduces babysitting in both females  
461 and males and decreases pup feeding in females (39). Together, this supports the  
462 hypothesis that the mechanism by which early life stress increases the cooperative  
463 behaviour of daughters is by dampening the activity of their neuroendocrine stress axis.

464 Our results show that the effects of maternal GCs on offspring growth,  
465 physiology, and behaviour were greater in daughters than in sons, which adds to  
466 biomedical (65-66) and ecological (67-69) studies that highlight how early life conditions  
467 or maternal GC levels can have sex-specific consequences for offspring. In meerkats,  
468 there may be added benefits for the dominant female for altering the cooperative  
469 behaviour of daughters compared to sons; daughters exhibit more cooperative  
470 behaviour than sons (36) and are more responsive to the begging calls of subsequent  
471 offspring that they provision with food (70). More broadly, sex-differences in natal  
472 dispersal may cause these differential responses to parental effects. In meerkats,  
473 subordinate males voluntarily disperse from their natal group to look for receptive  
474 females but can return to their natal group whereas subordinate females rarely  
475 voluntarily disperse from their natal group (71). In our case and in others (63), the more

476 philopatric sex (females) is more sensitive to early life conditions, which may be due to  
477 differential costs of parental modification between the philopatric and dispersing sex. If  
478 parental effects have long-term consequences on offspring characteristics, as we show  
479 here, there may be an increased degree of mismatch between the phenotype of the  
480 dispersing sex and the postnatal environment where individuals eventually settle. If this  
481 mismatch has fitness costs, this should select for individuals from the dispersing sex to  
482 be less responsive to cues from the parental phenotype or environment.

483         Our results provide some support for the hypothesis that parents may alter the  
484 cooperative tendencies of their offspring by manipulating the characteristics of their  
485 offspring (9-10), though we note that it is uncertain if the transfer of maternal GCs to  
486 offspring was passive or active. Explanations regarding the evolutionary origins of  
487 cooperative behaviour involve nepotism or kin selection (72), mutualisms or reciprocity  
488 (73), but few studies have tested the “parental manipulation” hypothesis proposed by  
489 Alexander (9). Some studies show that alleles that increase maternal fitness at the  
490 expense of the direct fitness of offspring can evolve (19) and that cooperative breeders  
491 may bias investment towards offspring that exhibit more cooperative behaviour (74).  
492 Our study supports the hypothesis that environmental stressors may induce a parental  
493 effect that can modify the cooperative tendencies of their offspring.

494         Finally, our results have two implications for theoretical models examining the  
495 evolution of parental effects. First, given the sex-specificity of parental effects, our  
496 results challenge the conclusions of models examining the evolution of parental effects  
497 that assume that all offspring are equally sensitive to the parental effect (16), or those  
498 that assume that the benefits of exhibiting the phenotype resulting from the parental

499 effect are equal for all offspring (18). Second, selfish parental effects are thought to be  
500 relatively rare (8, 13) and theory (16-17) and empirical studies showing sex-specific  
501 responses to early life stress (65-66) indicate that offspring can become resistant to  
502 such selfish parental effects. However, some models indicate that the evolution of  
503 selfish parental effects may be dependent upon the social environment (24), especially  
504 if the selfish parental effect influences the expression of alloparental care behaviour of  
505 offspring and therefore increases the indirect fitness of offspring. Our results provide an  
506 example whereby a GC-mediated maternal effect should decrease the direct fitness of  
507 daughters (by reducing their early life growth), but should increase the direct fitness of  
508 mothers and indirect fitness of daughters by elevating their cooperative behaviour.

509

510 **Ethics:** All protocols used in our experiments were approved by the Animal Ethics  
511 Committee at the University of Pretoria (Pretoria, South Africa: #EC031-13, #EC047-16)  
512 and the Northern Cape Department of Environment and Nature Conservation Research  
513 (South Africa: FAUNA 050/2013, FAUNA 192/2014, FAUNA 1020/2016).

514

515 **Acknowledgements:** We thank M. Manser for her contributions to maintain the long-  
516 term Kalahari Meerkat Project (KMP) and her contributions to this specific project.  
517 Thanks to P. Roth, S. Bischoff-Mattson, L. Howell, J. Samson, N. Thavarajah, and  
518 numerous KMP volunteers who contributed to data collection. Thanks to M. Manser and  
519 S. Guindre-Parker for helpful comments. Thanks to the Northern Cape Conservation  
520 Authority for permission to conduct research and the Kotze family for allowing us to  
521 study meerkats on their property.

522

523 **Authors' Contributions:** B.D. and T.H.C-B planned the study, B.D. designed the  
524 experiments, B.D., C. Dubuc, D.L.C, T.H.C-B, D.G., I.BG., N.B., M.H., A.G., and C.  
525 Duncan coordinated and collected data, B.D. conducted analyses and produced figures,  
526 B.D. and T.H.C-B authored manuscript with contributions from all authors.

527

528 **Date, code and materials:** All data will be archived on Data Dryad. All code for  
529 statistical analyses is available from first author.

530

531 **Competing interests:** We have no competing interests.

532

533 **Funding:** Research was supported by grants from National Environment Research  
534 Council (RG53472) and the European Research Council (294494) to T.H.C-B. I.B.G.  
535 was funded by the Swiss National Science Foundation (grant no. 31003A\_13676 to M.  
536 Manser). NCB was supported by a DST-NRF SARCHI chair of Mammal Behavioural  
537 Ecology and Physiology. The KMP has also been financed by the University of  
538 Cambridge (T.H.C.-B) and University of Zurich (M. Manser).

539



540 **References**

- 541 1) Wolf JB, Wade MJ (2009) What are maternal effects (and what are they not)?  
542 *Philosophical Transactions of the Royal Society B: Biological*  
543 *Sciences*, 364(1520), 1107-1115.
- 544 2) Kirkpatrick M, Lande R (1989) The evolution of maternal characters. *Evolution*, 43(3),  
545 485-503.
- 546 3) Mousseau TA, Fox CW (Eds.) (1998) *Maternal Effects as Adaptations*. Oxford  
547 University Press.
- 548 4) Agrawal AA, Laforsch C, Tollrian R (1999) Transgenerational induction of defences in  
549 animals and plants. *Nature* 401, 60-63
- 550 5) Dantzer B, Newman AE, Boonstra R, Palme R, Boutin S, Humphries MM, McAdam  
551 AG (2013) Density triggers maternal hormones that increase adaptive offspring  
552 growth in a wild mammal. *Science*, 1235765.
- 553 6) Duckworth RA, Belloni V, Anderson SR (2015) Cycles of species replacement  
554 emerge from locally induced maternal effects on offspring behavior in a  
555 passerine bird. *Science*, 347(6224), 875-877.
- 556 7) Uller T (2008) Developmental plasticity and the evolution of parental effects. *Trends*  
557 *in Ecology & Evolution*, 23(8), 432-438.
- 558 8) Uller T, Nakagawa S, English S (2013) Weak evidence for anticipatory parental  
559 effects in plants and animals. *Journal of Evolutionary Biology*, 26(10), 2161-2170.
- 560 9) Alexander, RD, (1974) The evolution of social behavior. *Annual Review of Ecology*  
561 *and Systematics*, 5(1), 325-383.
- 562 10) Michener CD, Brothers DJ 1974 Were workers of eusocial Hymenoptera initially

- 563 altruistic or oppressed? *Proceedings of the National Academy of Science USA*  
564 71, 671–674
- 565 11) Müller W, Lessells CKM, Korsten P, Engelhardt NV (2007) Manipulative signals in  
566 family conflict? On the function of maternal yolk hormones in birds. *The American*  
567 *Naturalist*, 169(4), E84-E96.
- 568 12) Schwarzkopf L, Andrews RM (2012) Are moms manipulative or just selfish?  
569 Evaluating the “maternal manipulation hypothesis” and implications for life-history  
570 studies of reptiles. *Herpetologica*, 68(2), 147-159.
- 571 13) Marshall DJ, Uller T (2007) When is a maternal effect adaptive?. *Oikos*, 116(12),  
572 1957-1963.
- 573 14) Wilson AJ, Pilkington JG, Pemberton JM, Coltman DW, Overall AD, Byrne KA,  
574 Kruuk, LEB (2005) Selection on mothers and offspring: whose phenotype is it  
575 and does it matter? *Evolution*, 59(2), 451-463.
- 576 15) Berghänel A, Heistermann M, Schülke O, Ostner J (2017) Prenatal stress  
577 accelerates offspring growth to compensate for reduced maternal investment  
578 across mammals. *Proceedings of the National Academy of Sciences*, 114(50),  
579 E10658-E10666.
- 580 16) Uller T, Pen I (2011) A theoretical model of the evolution of maternal effects under  
581 parent–offspring conflict. *Evolution*, 65(7), 2075-2084.
- 582 17) Kuijper B, Johnstone RA (2018) Maternal effects and parent–offspring  
583 conflict. *Evolution*, 72(2), 220-233.
- 584 18) González-Forero M, Gavrilets S (2013) Evolution of manipulated behavior. *The*  
585 *American Naturalist*, 182(4), 439-451.

- 586 19) Wade MJ (2001) Maternal effect genes and the evolution of sociality in haplo-diploid  
587 organisms. *Evolution*, 55(3), 453-458.
- 588 20) Linksvayer TA, Wade MJ (2005) The evolutionary origin and elaboration of sociality  
589 in the aculeate Hymenoptera: maternal effects, sib-social effects, and  
590 heterochrony. *The Quarterly Review of Biology*, 80, 317-336.
- 591 21) Bourke AF, Franks NR (1995). *Social Evolution in Ants*. Princeton University Press.
- 592 22) Clutton-Brock TH (2016) *Mammal Societies*. Wiley-Blackwell
- 593 23) Russell A F, Lummaa V (2009) Maternal effects in cooperative breeders: from  
594 hymenopterans to humans. *Philosophical Transactions of the Royal Society B:*  
595 *Biological Sciences*, 364(1520), 1143-1167.
- 596 24) Taborsky B (2017) Developmental plasticity: preparing for life in a complex  
597 world. *Advances in the Study of Behavior*, 49, 49-99.
- 598 25) Carter CS, Roberts RL. (1997) The psychobiological basis of cooperative breeding  
599 in rodents. In *Cooperative Breeding in Mammals* (Eds.: NG Solomon, JA  
600 French), Cambridge University Press, Pp. 231-266.
- 601 26) De Fraipont M, Clobert J, Alder HJ, Meylan S (2000) Increased pre-natal maternal  
602 corticosterone promotes philopatry of offspring in common lizards *Lacerta*  
603 *vivipara*. *Journal of Animal Ecology*, 69(3), 404-413.
- 604 27) Clutton-Brock TH, Brotherton PNM, O'riain MJ, Griffin AS, Gaynor D, Kansky R,  
605 Sharpe L, McIlrath GM (2001) Contributions to cooperative rearing in  
606 meerkats. *Animal Behaviour*, 61(4), 705-710.
- 607 28) Russell AF, Clutton-Brock TH, Brotherton PN, Sharpe LL, Mcilrath G, Dalerum FD,  
608 Cameron EZ, Barnard JA (2002). Factors affecting pup growth and survival in co-

- 609           operatively breeding meerkats *Suricata suricatta*. *Journal of Animal*  
610           *Ecology*, 71(4), 700-709.
- 611 29) Thornton A (2008) Social learning about novel foods in young meerkats. *Animal*  
612           *Behaviour*, 76(4), 1411-1421.
- 613 30) Hodge SJ, Manica A, Flower TP, Clutton-Brock TH (2008) Determinants of  
614           reproductive success in dominant female meerkats. *Journal of Animal*  
615           *Ecology*, 77(1), 92-102.
- 616 31) English S, Huchard E, Nielsen JF, Clutton-Brock TH (2013) Early growth,  
617           dominance acquisition and lifetime reproductive success in male and female  
618           cooperative meerkats. *Ecology and Evolution*, 3(13), 4401-4407.
- 619 32) Russell AF, Young AJ, Spong G, Jordan NR, Clutton-Brock TH (2007) Helpers  
620           increase the reproductive potential of offspring in cooperative  
621           meerkats. *Proceedings of the Royal Society of London B: Biological*  
622           *Sciences*, 274(1609), 513-520.
- 623 33) Clutton-Brock TH, Gaynor D, Kansky R, MacColl ADC, McIlrath G, Chadwick P,  
624           Brotherton PNM, O'rian JM, Manser M, Skinner JD (1998) Costs of cooperative  
625           behaviour in suricates (*Suricata suricatta*). *Proceedings of the Royal Society of*  
626           *London B: Biological Sciences*, 265(1392), 185-190.
- 627 34) Brotherton PNM, Clutton-Brock TH, O'riain MJ, Gaynor D, Sharpe L, Kansky R,  
628           McIlrath GM (2001) Offspring food allocation by parents and helpers in a  
629           cooperative mammal. *Behavioral Ecology*, 12(5), 590-599.
- 630 35) Russell AF, Sharpe LL, Brotherton PNM, Clutton-Brock TH (2003) Cost

- 631 minimization by helpers in cooperative vertebrates. Proceedings of the National  
632 Academy of Sciences USA 100(6), 3333-3338.
- 633 36) Clutton-Brock TH, Russell AF, Sharpe LL, Young AJ, Balmforth Z, McIlrath GM  
634 (2002). Evolution and development of sex differences in cooperative behavior in  
635 meerkats. *Science*, 297(5579), 253-256.
- 636 37) Bell MBV, Cant MA, Borgeaud C, Thavarajah N, Samson J, Clutton-Brock TH  
637 (2014) Suppressing subordinate reproduction provides benefits to dominants in  
638 cooperative societies of meerkats. *Nature Communications* 5, 4499
- 639 38) Harris A, Seckl J (2011) Glucocorticoids, prenatal stress and the programming of  
640 disease. *Hormones and Behavior*, 59(3), 279-289.
- 641 39) Dantzer B, Goncalves IB, Spence-Jones HC, Bennett NC, Heistermann M,  
642 Ganswindt A, Dubuc C, Gaynor D, Manser MB, Clutton-Brock TH 2017. The  
643 influence of stress hormones and aggression on cooperative behaviour in  
644 subordinate meerkats. *Proc. R. Soc. B*, 284(1863), 20171248.
- 645 40) English S, Bateman AW, Mares R, Ozgul A, Clutton-Brock TH (2014) Maternal,  
646 social and abiotic environmental effects on growth vary across life stages in a  
647 cooperative mammal. *Journal of Animal Ecology*, 83(2), 332-342.
- 648 41) Kutsukake N, Clutton-Brock TH (2006) Aggression and submission reflect  
649 reproductive conflict between females in cooperatively breeding meerkats  
650 *Suricata suricatta*. *Behav. Ecol. Sociobiol.* 59, 541-548. (doi: 10.1007/s00265-  
651 005-0079-7)
- 652 42) Clutton-Brock TH, Brotherton PNM, O'Riain MJ, Griffin AS, Gaynor D, Sharpe L,

- 653 Kansky R, Manser MB, McIlrath GM (2000). Individual contributions to  
654 babysitting in a cooperative mongoose, *Suricata suricatta*. *Proceedings of the*  
655 *Royal Society of London B: Biological Sciences*, 267(1440), 301-305.
- 656 43) Kunc HP, Madden JR, Manser MB (2007) Begging signals in a mobile feeding  
657 system: The evolution of different call types. *The American Naturalist* 170, 617-  
658 624.
- 659 44) Carlson AA, Young AJ, Russell AF, Bennett NC, McNeilly AS, Clutton-Brock T  
660 (2004). Hormonal correlates of dominance in meerkats (*Suricata*  
661 *suricatta*). *Hormones and Behavior*, 46(2), 141-150.
- 662 45) Dantzer B, Bennett NC, Clutton-Brock TH (2017) Social conflict and costs of  
663 cooperation in meerkats are reflected in measures of stress  
664 hormones. *Behavioral Ecology*, 28(4), 1131-1141.
- 665 46) Heistermann M, Finke M, Hodges JK (1995) Assessment of female reproductive  
666 status in captive-housed Hanuman langurs (*Presbytis entellus*) by measurement  
667 of urinary and fecal steroid excretion patterns. *Am. J. Primatol.* 37, 275-284. (doi:  
668 [10.1002/ajp.1350370402](https://doi.org/10.1002/ajp.1350370402))
- 669 47) Braga Goncalves I, Heistermann M, Santema P, Dantzer B, Mausbach J,  
670 Ganswindt A, Manser, MB (2016) Validation of a fecal glucocorticoid assay to  
671 assess adrenocortical activity in meerkats using physiological and biological  
672 stimuli. *PloS One*, 11(4), e0153161.
- 673 48) Heistermann M, Palme R, Ganswindt A (2006) Comparison of different  
674 enzyme immunoassays for assessment of adrenocortical activity in primates  
675 based on fecal analysis. *American Journal of Primatology* 68, 257-273.

- 676 49) Clutton-Brock TH, Russell AF, Sharpe LL (2003) Meerkat helpers do not specialize  
677 in particular activities. *Animal Behaviour* 66(3), 531-540.
- 678 50) Carlson AA, Manser MB, Young AJ, Russell AF, Jordan NR, McNeilly AS, Clutton-  
679 Brock T (2006) Cortisol levels are positively associated with pup-feeding rates in  
680 male meerkats *Proceedings of the Royal Society B* 273(1586), 571-577.
- 681 51) Lesnoff M, Lancelot R (2013) aods3: analysis of overdispersed data using S3  
682 methods. aods3 package version 0.4-1.
- 683 52) R Development Core Team. 2013. R: A language and environment for statistical  
684 computing. R Foundation for Statistical Computing, Vienna, Austria; available at  
685 [www.r-project.org/](http://www.r-project.org/).
- 686 53) Bates D, Maechler M, Bolker B, Walker S (2014) lme4: Linear mixed-effects models  
687 using Eigen and S4. *R Package Version 1(7)*, 1-23.
- 688 54) Kuznetsova A, Brockhoff PB, Christensen RHB (2016) lmerTest: Tests in Linear  
689 Mixed Effects Models. R package version 2.0-30; available at [http://CRAN.R-](http://CRAN.R-project.org/package=lmerTest)  
690 [project.org/package=lmerTest](http://CRAN.R-project.org/package=lmerTest)
- 691 55) Zuur AF, Ieno EN, Elphick CS (2010) A protocol for data exploration to avoid  
692 common statistical problems. *Meth. Ecol. Evol.* 1, 3-14. (doi: 10.1111/j.2041-  
693 210X.2009.00001.x)
- 694 56) Fox J, Monette G (1992) Generalized collinearity diagnostics. *Journal of the*  
695 *American Statistical Association* 87(417), 178-183.
- 696 57) Clutton-Brock TH, Russell AF, Sharpe LL, Brotherton PNM, McIlrath GM, White S,  
697 Cameron EZ (2001) Effects of helpers on juvenile development and survival in  
698 meerkats. *Science*, 293(5539), 2446-2449.

- 699 58) Huchard E, English S, Bell MB, Thavarajah N, Clutton-Brock T (2016) Competitive  
700 growth in a cooperative mammal. *Nature*, 533(7604), 532.
- 701 59) Hatchwell BJ, Komdeur J (2000) Ecological constraints, life history traits and the  
702 evolution of cooperative breeding. *Animal Behaviour* 59(6), 1079-1086.
- 703 60) Cant MA, Field J (2001) Helping effort and future fitness in cooperative animal  
704 societies. *Proceedings of the Royal Society B* 268, 1959-1964.
- 705 61) Field J, Cronin A, Bridge C (2006) Future fitness and helping in social  
706 queues. *Nature*, 441(7090), 214.
- 707 62) Zöttl M, Chapuis L, Freiburghaus M, Taborsky M (2013). Strategic reduction of help  
708 before dispersal in a cooperative breeder. *Biology Letters*, 9(1), 20120878.
- 709 63) Sheriff MJ, Bell A, Boonstra R, Dantzer B, Lavergne SG, McGhee KE, MacLeod KJ,  
710 Winandy L, Zimmer C, Love OP (2017) Integrating ecological and evolutionary  
711 context in the study of maternal stress. *Integrative and Comparative*  
712 *Biology*, 57(3), 437-449.
- 713 64) Raulo A, Dantzer B. (2018) Associations between glucocorticoids and sociality  
714 across a continuum of vertebrate social behaviour. *Ecology and Evolution* in  
715 press (doi: 10.1002/ece3.4059).
- 716 65) Weinstock M (2007) Gender differences in the effects of prenatal stress on brain  
717 development and behaviour. *Neurochemical Research*, 32(10), 1730-1740.
- 718 66) Mueller, BR, Bale, TL (2008) Sex-specific programming of offspring emotionality  
719 after stress early in pregnancy. *Journal of Neuroscience*, 28(36), 9055-9065.
- 720 67) Wilkin TA, Sheldon BC (2009) Sex differences in the persistence of natal  
721 environmental effects on life histories. *Current Biology*, 19(23), 1998-2002.



- 722 68) Metzger DC, Schulte PM (2016) Maternal stress has divergent effects on gene  
723 expression patterns in the brains of male and female threespine  
724 stickleback. *Proc. R. Soc. B*, 283(1839), 20161734.
- 725 69) Marshall HH, Vitikainen EI, Mwanguhya F, Businge R, Kyabulima S, Hares MC,  
726 Inzani E, Kalema-Zikusoka G, Mwesige K, Nichols HJ, Sanderson JL, Thompson  
727 FJ, Cant MA (2017) Lifetime fitness consequences of early-life ecological  
728 hardship in a wild mammal population. *Ecology and Evolution*, 7(6), 1712-1724.
- 729 70) English S, Kunc HP, Madden JR, Clutton-Brock TH (2008) Sex differences in  
730 responsiveness to begging in a cooperative mammal. *Biology Letters*, 4(4), 334-  
731 337.
- 732 71) Clutton-Brock TH, Manser M (2016) Meerkats: cooperative breeding in the Kalahari.  
733 *Cooperative Breeding in Vertebrates* (Eds.: WD Koenig, JL Dickinson).  
734 Cambridge University Press, Pp. 294-317
- 735 72) Hamilton WD (1964) The genetical evolution of social behaviour. II. *Journal of*  
736 *Theoretical Biology*, 7(1), 17-52.
- 737 73) Trivers RL (1971) The evolution of reciprocal altruism. *The Quarterly Review of*  
738 *Biology*, 46(1), 35-57.
- 739 74) Griffin AS, Sheldon BC, West SA (2005) Cooperative breeders adjust offspring sex  
740 ratios to produce helpful helpers. *The American Naturalist*, 166(5), 628-632.
- 741  
742

743 **Figure 1.** (A) Daughters but not (B) sons from mothers treated with cortisol during  
744 pregnancy were significantly smaller from initial emergence from their natal burrow to  
745 nutritional independence (~1-3 months) compared to those from control mothers  
746 (daughters: age x treatment,  $t = -4.17$ ,  $P < 0.0001$ ; sons:  $t = -1.48$ ,  $P = 0.14$ ), but not  
747 untreated mothers (daughters: age x treatment,  $t = 0.65$ ,  $P = 0.51$ ; sons:  $t = -0.52$ ,  $P =$   
748 0.6, Table 3). Data are body mass measures from offspring from cortisol-treated  
749 (females:  $n = 373$  estimates; males:  $n = 488$ ), control (females:  $n = 215$ ; males:  $n =$   
750 241), and untreated mothers (females:  $n = 1121$ ; males:  $n = 2238$ ). Raw data and  
751 regression lines are shown (full results in Table 3).

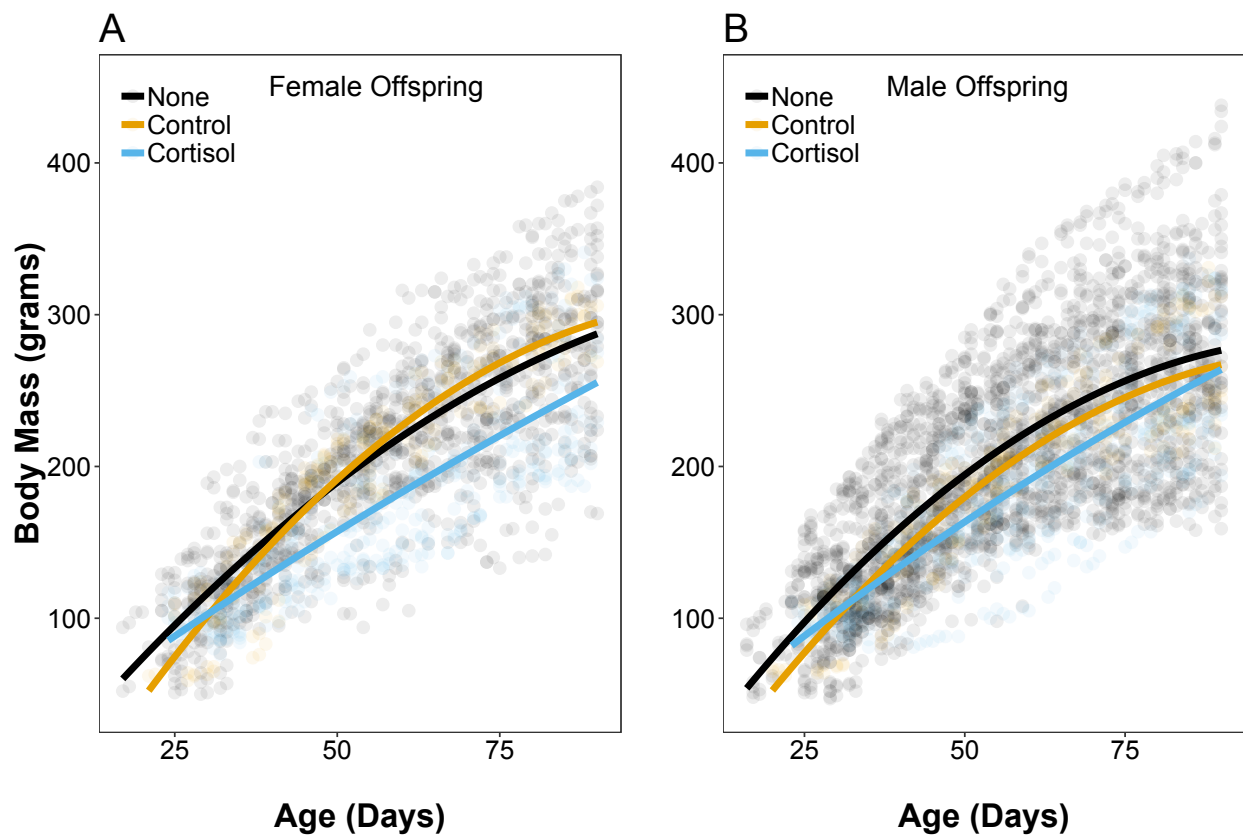

752

753

754 **Figure 2.** Babysitting contributions of (A) daughters and (B) sons from mothers treated  
755 with cortisol during pregnancy increased with age at a faster rate than those from  
756 control (females:  $z = -2.89$ ,  $P = 0.0039$ ; males:  $z = -1.92$ ,  $P = 0.055$ ), but not untreated  
757 (“None”) mothers (females:  $z = 1.88$ ,  $P = 0.06$ ; males:  $z = -0.03$ ,  $P = 0.97$ , Table 4).  
758 Data are relative babysitting contributions from offspring from cortisol-treated (females:  
759  $n = 15$  estimates; males:  $n = 24$ ), control (females:  $n = 15$ ; males:  $n = 10$ ), and untreated  
760 mothers (females:  $n = 49$ ; males:  $n = 69$ ). Raw data and regression lines are shown (full  
761 results in Table 4).

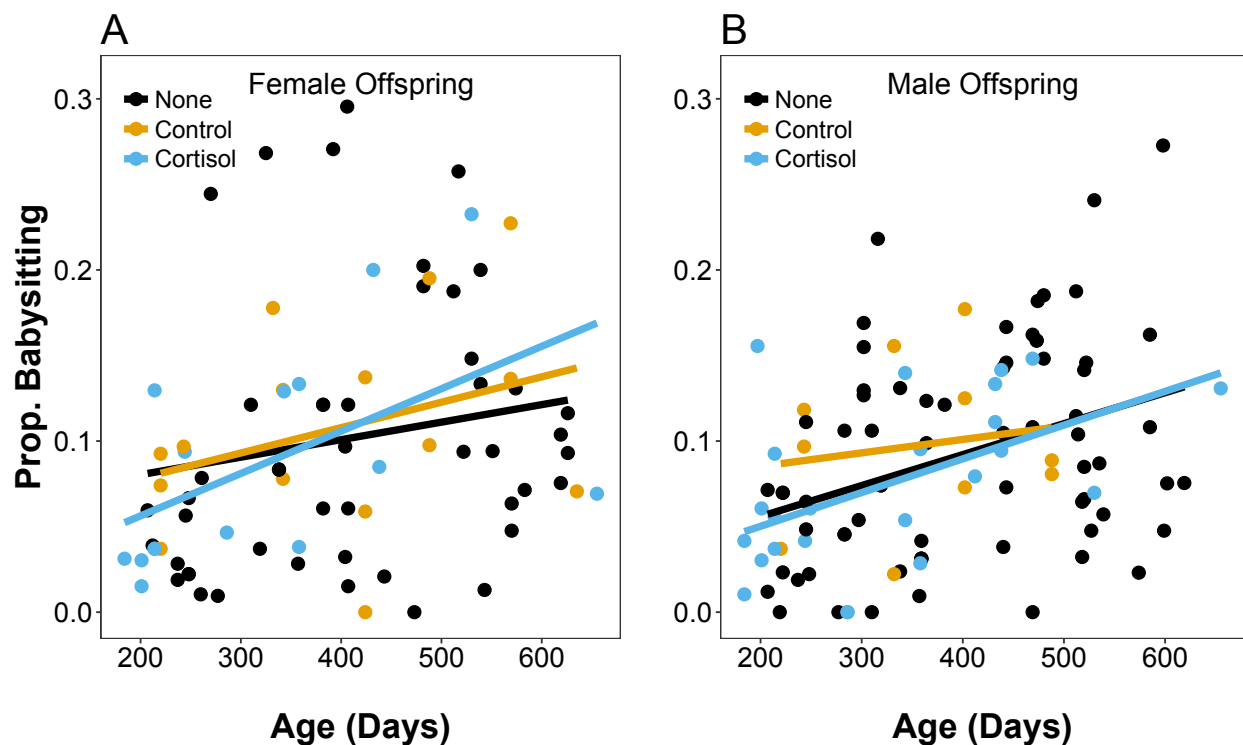

762

763

764 **Figure 3.** Pup feeding contributions of (A) daughters, but not (B) sons, from mothers  
765 treated with cortisol during pregnancy were significantly higher compared to from control  
766 (females:  $z = -3.09$ ,  $P = 0.0004$ ; males:  $z = -1.15$ ,  $P = 0.25$ ) or untreated (“None”)  
767 mothers (females:  $z = -3.47$ ,  $P = 0.0005$ ; males:  $z = -0.89$ ,  $P = 0.37$ , Table 5). Data are  
768 relative pup feeding contributions from offspring from cortisol-treated (females:  $n = 16$   
769 estimates; males:  $n = 26$ ), control (females:  $n = 16$ ; males:  $n = 10$ ), and untreated  
770 mothers (females:  $n = 64$ ; males:  $n = 71$ ). Raw data are shown (full results in Table 5).  
771 Boxplots show median (solid horizontal line), mean (grey diamonds), and first (25%)  
772 and third (75%) quartiles.

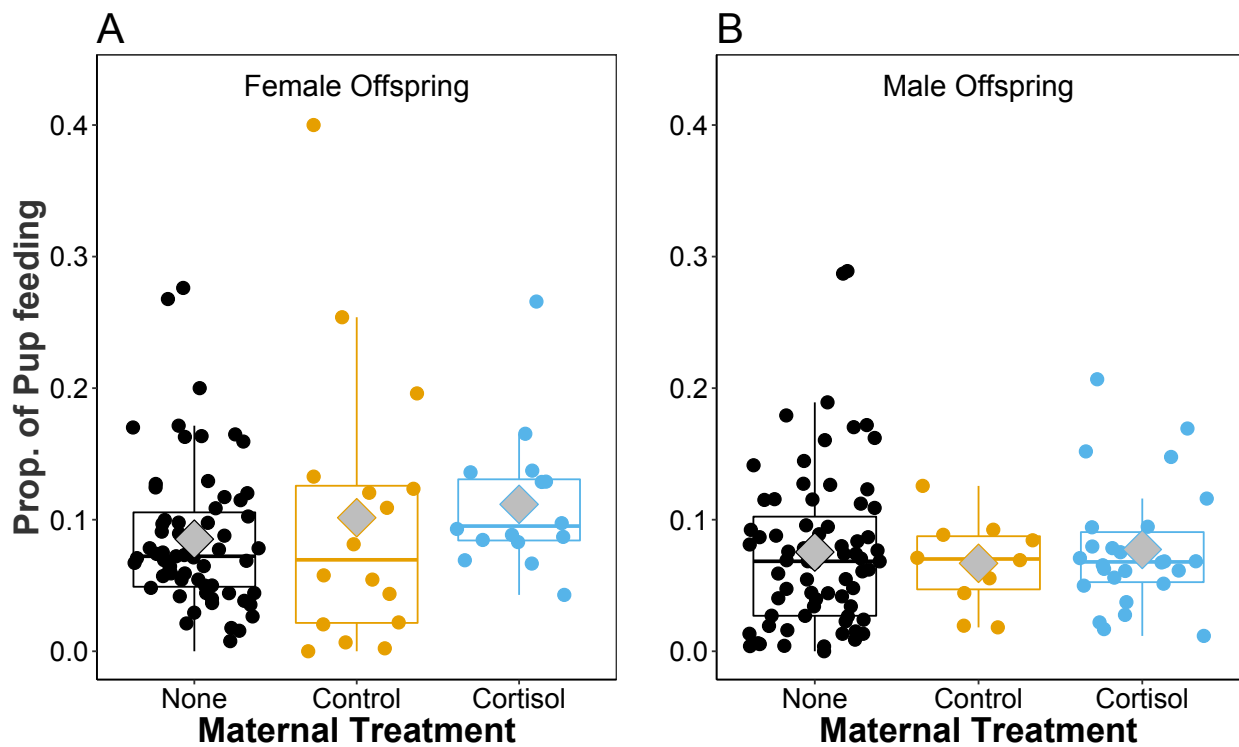

773

774

775 **Figure 4.** (A) Daughters and (B) sons from mothers treated with cortisol during  
776 pregnancy had lower plasma cortisol concentrations as they became older compared to  
777 those from control mothers, though the difference was only significant in males  
778 (daughters: age x treatment,  $t = -1.76$ ,  $P = 0.08$ ; sons: age x treatment  $t = -2.68$ ,  $P =$   
779  $0.008$ , Table 6). Data are residual plasma cortisol concentrations from offspring from  
780 cortisol-treated (females:  $n = 64$  samples; males:  $n = 92$ ) and control (females:  $n = 89$ ;  
781 males:  $n = 104$ ) mothers. Residuals from a linear mixed-effects model (Table 6) are  
782 shown on y-axis.

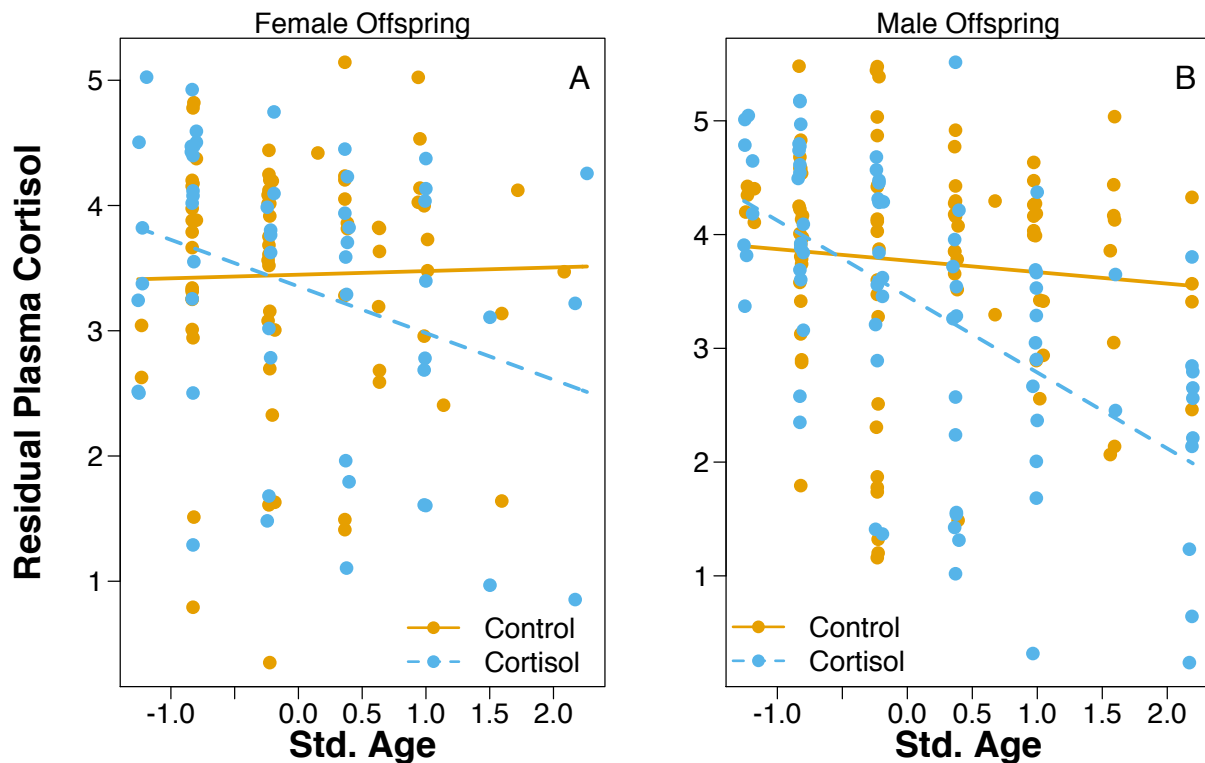

783

784

785 **Figure 5.** Faecal glucocorticoid metabolite (fGCM) concentrations in (A) daughters but  
786 not (B) sons from mothers treated with cortisol during pregnancy were significantly  
787 lower than those from control mothers as they became older (daughters: age x  
788 treatment,  $t = -2.9$ ,  $P = 0.004$ ; sons: age x treatment,  $t = -0.1$ ,  $P = 0.49$ , Table 7. Data  
789 are residual fGCM concentrations from offspring from cortisol-treated (females:  $n = 79$   
790 samples; males:  $n = 118$ ) and control (females:  $n = 154$ ; males:  $n = 201$ ) mothers.  
791 Residuals from a linear mixed-effects model (Table 7) are shown on y-axis.

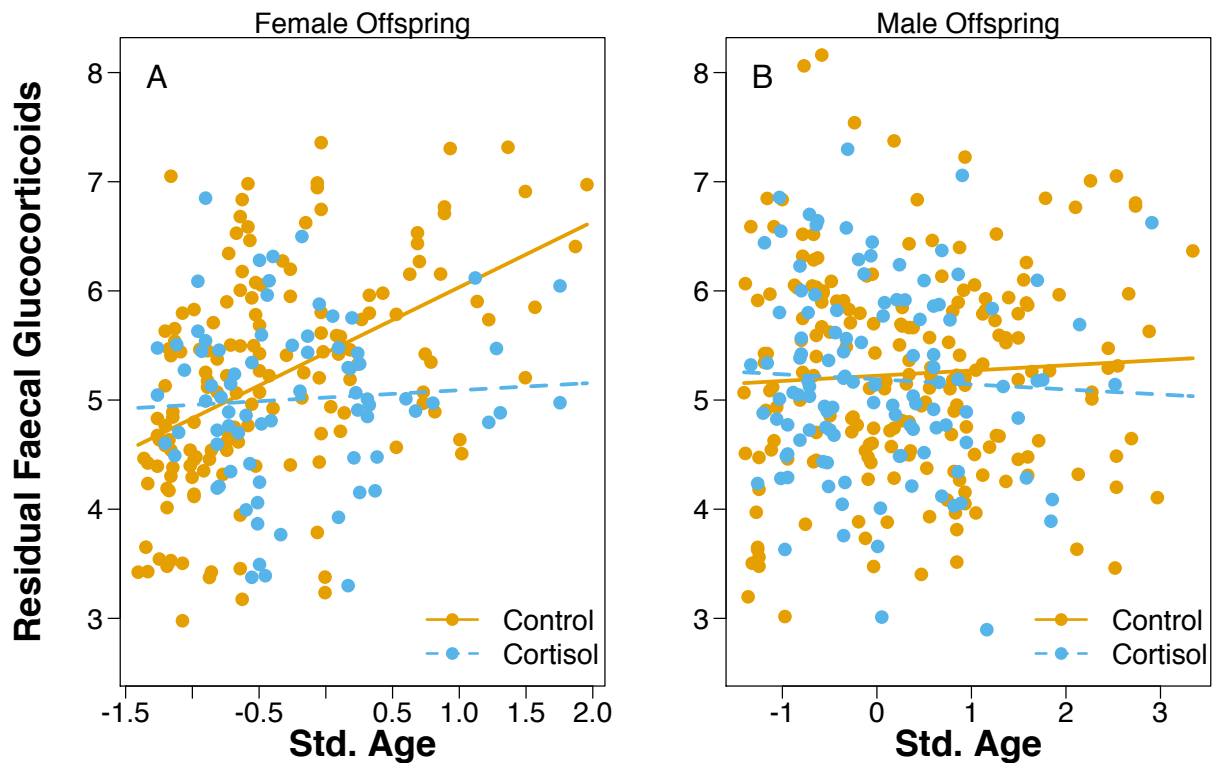

792

793

794

795

796 **Table 1. Summary of effects of dominant female treatments on litter characteristics and**  
797 **offspring survival.** Number of pups emerged correspond to those that emerged from the natal  
798 burrow and in some cases these pups died before their sex could be determined (shown as  
799 “Unk”). Three of the 13 litters treated with cortisol and one of the 7 control (fed) litters were  
800 aborted prior to birth.

| <b>Treatment</b> | <b>Total # litters<br/>&amp; females<br/>treated</b> | <b>Total # pups<br/>emerged<br/>(F, M, Unk)</b> | <b>Avg. Pups<br/>emerged</b> | <b>Avg. Pups<br/>Surviving to<br/>3 months</b> | <b>Avg. Pups<br/>Surviving to<br/>6 months</b> | <b>Avg. Pups<br/>Surviving to<br/>12 months</b> |
|------------------|------------------------------------------------------|-------------------------------------------------|------------------------------|------------------------------------------------|------------------------------------------------|-------------------------------------------------|
| Untreated        | 52 (21 females)                                      | 49 F, 84 M, 52 Unk                              | 3.78 ± 1.23                  | 2.68 ± 1.58                                    | 2.1 ± 1.63                                     | 1.62 ± 1.54                                     |
| Control          | 7 (6 females)                                        | 12 F, 13 M                                      | 4.17 ± 0.98                  | 3.83 ± 1.17                                    | 3.83 ± 1.17                                    | 2.83 ± 1.94                                     |
| Cortisol         | 13 (10 females)                                      | 13 F, 18 M                                      | 3.87 ± 0.83                  | 3.25 ± 1.03                                    | 2.75 ± 1.28                                    | 1.75 ± 1.75                                     |

801  
802

803 **Table 2. Effects of dominant female treatments (cortisol or control) on litter characteristics**  
 804 **and pup survival.** Results are from a linear mixed-effects model (# pups emerged) or  
 805 generalized linear mixed-effects models (GLMMs, all other response variables) that each  
 806 contained random intercept terms for dominant female identity and year. No GLMM was  
 807 overdispersed as indicated by goodness of fit tests (R package aods3, P-values from Pearson  $\chi^2$   
 808 tests ranged from 0.13 to 1). The number of litters aborted by untreated females was not known  
 809 so we only assessed the effects of cortisol vs. control treatments on the number of litters aborted.  
 810 Litter sex ratio is the proportion of males in the litter.

| Response variable                          | Fixed effect     | b            | SE          | t or z        | P-value           |
|--------------------------------------------|------------------|--------------|-------------|---------------|-------------------|
| <b># Litters aborted</b>                   |                  |              |             |               |                   |
|                                            | Intercept        | -1.21        | 0.66        | -1.83         | 0.07              |
|                                            | Birthdate        | -0.17        | 0.59        | -0.29         | 0.77              |
|                                            | Treatment        |              |             |               |                   |
|                                            | <i>Control</i>   | -0.59        | 1.27        | -0.46         | 0.64              |
| <b># Pups emerged</b>                      |                  |              |             |               |                   |
|                                            | <b>Intercept</b> | <b>3.9</b>   | <b>0.42</b> | <b>9.36</b>   | <b>&lt;0.0001</b> |
|                                            | Birthdate        | 0.02         | 0.16        | 0.11          | 0.91              |
|                                            | Treatment        |              |             |               |                   |
|                                            | <i>Control</i>   | 0.3          | 0.62        | 0.49          | 0.63              |
|                                            | <i>Untreated</i> | -0.11        | 0.45        | -0.25         | 0.8               |
| <b>Litter sex ratio</b>                    |                  |              |             |               |                   |
|                                            | Intercept        | -0.54        | 0.3         | -1.84         | 0.066             |
|                                            | Birthdate        | 0.02         | 0.12        | 0.15          | 0.88              |
|                                            | Treatment        |              |             |               |                   |
|                                            | <i>Control</i>   | -0.11        | 0.45        | -0.23         | 0.81              |
|                                            | <i>Untreated</i> | 0.09         | 0.33        | 0.27          | 0.78              |
| <b>Prop. litter surviving to 3 months</b>  |                  |              |             |               |                   |
|                                            | Intercept        | -0.16        | 0.27        | -0.62         | 0.53              |
|                                            | Birthdate        | -0.12        | 0.11        | -1.09         | 0.27              |
|                                            | Treatment        |              |             |               |                   |
|                                            | <i>Control</i>   | 0.06         | 0.39        | 0.16          | 0.87              |
|                                            | <i>Untreated</i> | -0.19        | 0.3         | -0.64         | 0.52              |
| <b>Prop. litter surviving to 6 months</b>  |                  |              |             |               |                   |
|                                            | Intercept        | -0.32        | 0.28        | -1.16         | 0.24              |
|                                            | Birthdate        | -0.19        | 0.11        | -1.65         | 0.099             |
|                                            | Treatment        |              |             |               |                   |
|                                            | <i>Control</i>   | 0.21         | 0.4         | 0.52          | 0.6               |
|                                            | <i>Untreated</i> | -0.28        | 0.31        | -0.91         | 0.36              |
| <b>Prop. litter surviving to 12 months</b> |                  |              |             |               |                   |
|                                            | <b>Intercept</b> | <b>-0.91</b> | <b>0.46</b> | <b>-1.999</b> | <b>0.046</b>      |
|                                            | Birthdate        | -0.22        | 0.14        | -1.58         | 0.11              |
|                                            | Treatment        |              |             |               |                   |
|                                            | <i>Control</i>   | 0.36         | 0.46        | 0.79          | 0.43              |
|                                            | <i>Untreated</i> | 0.096        | 0.38        | 0.25          | 0.8               |

811 Reference for Treatment was cortisol-treated mothers. Data other than # litters aborted are based upon an  
 812 initial sample size of offspring from untreated (195 pups from 52 litters produced by 21 dominant  
 813 females), control (25 pups from 6 litters produced by 6 females), or cortisol-treated (31 pups from 10  
 814 litters produced by 9 females) litters that produced pups that emerged from the burrow.

815  
 816  
 817



818 **Table 3. Effect of dominant female treatments on offspring growth from emergence to**  
 819 **nutritional independence (1-3 months of age).** Data are from a linear mixed-effects model  
 820 where the response variable was morning body mass that contained random intercept terms for  
 821 individual identity nested in birth litter nested in mother nested in natal group ( $\sigma^2 = 116.7$ ) and  
 822 year ( $\sigma^2 = 0$ ). If fixed effects by themselves were involved in significant higher order interactions  
 823 with other variables, only parameter estimates are shown.

| Fixed Effect                                        | b            | SE          | t            | df          | P-value           |
|-----------------------------------------------------|--------------|-------------|--------------|-------------|-------------------|
| <b>Intercept</b>                                    |              |             |              |             |                   |
| <i>Females</i>                                      | <b>184.6</b> | <b>9.75</b> | <b>18.93</b> | <b>53</b>   | <b>&lt;0.0001</b> |
| <i>Males</i>                                        | <b>189.1</b> | <b>9.5</b>  | <b>19.8</b>  | <b>49</b>   | <b>&lt;0.0001</b> |
| Litter size                                         | -5.31        | 3.9         | -1.37        | 48          | 0.18              |
| <b>First weight</b>                                 | <b>15.96</b> | <b>2.52</b> | <b>6.344</b> | <b>166</b>  | <b>&lt;0.0001</b> |
| Sex (M)                                             | 4.54         | 4.32        |              |             |                   |
| Age                                                 | 53.3         | 1.06        |              |             |                   |
| Age <sup>2</sup>                                    | -4.76        | 1.15        |              |             |                   |
| <b>Rainfall</b>                                     | <b>2.81</b>  | <b>0.61</b> | <b>4.57</b>  | <b>4550</b> | <b>&lt;0.0001</b> |
| <b>Season (Sine)</b>                                | <b>-67.2</b> | <b>3.3</b>  | <b>-20.6</b> | <b>4238</b> | <b>&lt;0.0001</b> |
| <b>Season (Co-sine)</b>                             | <b>66.22</b> | <b>3.4</b>  | <b>19.2</b>  | <b>4191</b> | <b>&lt;0.0001</b> |
| Group size                                          | 2.3          | 2.66        | 0.86         | 109         | 0.39              |
| Group size <sup>2</sup>                             | -0.09        | 2.21        | -0.04        | 178         | 0.97              |
| Treatment (Control)                                 |              |             |              |             |                   |
| <i>Females</i>                                      | 22.6         | 15.6        |              |             |                   |
| <i>Males</i>                                        | 12.9         | 15.5        |              |             |                   |
| Treatment (None)                                    |              |             |              |             |                   |
| <i>Females</i>                                      | 23.6         | 10.6        |              |             |                   |
| <i>Males</i>                                        | 22.9         | 10.4        |              |             |                   |
| Age x Sex (M)                                       | 1.64         | 1.37        | 1.19         | 4567        | 0.23              |
| Age <sup>2</sup> x Sex (M)                          | 1.02         | 1.53        | 0.67         | 4543        | 0.5               |
| Sex (M) x Treatment (Control)                       | -9.73        | 7.7         | -1.27        | 164         | 0.21              |
| Sex (M) x Treatment (None)                          | -0.63        | 5.1         | -0.12        | 172         | 0.9               |
| <b>Age x Treatment (Control)</b>                    |              |             |              |             |                   |
| <i>Females</i>                                      | <b>7.6</b>   | <b>1.8</b>  | <b>4.17</b>  | <b>4595</b> | <b>&lt;0.0001</b> |
| <i>Males</i>                                        | -2.3         | 1.5         | -1.48        | 4548        | 0.14              |
| Age x Treatment (None)                              |              |             |              |             |                   |
| <i>Females</i>                                      | 0.79         | 1.2         | 0.65         | 4574        | 0.51              |
| <i>Males</i>                                        | -0.53        | 1.01        | -0.52        | 4580        | 0.6               |
| Age <sup>2</sup> x Treatment (Control)              |              |             |              |             |                   |
| <i>Females</i>                                      | -0.13        | 1.93        | -0.07        | 4521        | 0.94              |
| <i>Males</i>                                        | -1.05        | 1.6         | -0.65        | 4547        | 0.52              |
| <b>Age<sup>2</sup> x Treatment (None)</b>           |              |             |              |             |                   |
| <i>Females</i>                                      | -2.6         | 1.3         | -1.96        | 4534        | 0.051             |
| <i>Males</i>                                        | <b>-6.9</b>  | <b>1.1</b>  | <b>-6.23</b> | <b>4556</b> | <b>&lt;0.0001</b> |
| <b>Age x Treatment (Control) x Sex (M)</b>          | <b>-9.9</b>  | <b>2.3</b>  | <b>-4.23</b> | <b>4574</b> | <b>&lt;0.0001</b> |
| Age x Treatment (None) x Sex (M)                    | -1.3         | 1.6         | -0.84        | 4581        | 0.4               |
| Age <sup>2</sup> x Treatment (Control) x Sex (M)    | -0.93        | 2.5         | -0.37        | 4552        | 0.71              |
| <b>Age<sup>2</sup> x Treatment (None) x Sex (M)</b> | <b>-4.3</b>  | <b>1.7</b>  | <b>-2.5</b>  | <b>4552</b> | <b>0.01</b>       |

824 Data used in these analyses were 4676 measures of body mass from 195 meerkats produced by 21  
 825 dominant females across 53 different litters in 16 different social groups in three different years. Only  
 826 offspring that survived to 90 days of age were included in these analyses.

827

828 **Table 4. Effect of dominant female treatments on relative babysitting contributions.** Data  
 829 are from a generalized linear mixed-effects model where the response variable is the proportion  
 830 of babysitting exhibited by the subordinate meerkat relative to the total babysitting contributions  
 831 the litter received. The model contained random intercept terms for individual ( $\sigma^2 = 0.12$ ), litter  
 832 nested within group ( $\sigma^2 = < 0.0001$ ), and year ( $\sigma^2 = 0.000$ ). If fixed effects by themselves were  
 833 involved in significant higher order interactions with other variables, only parameter estimates  
 834 are shown.

| Fixed Effect                        | b            | SE          | z             | P-value            |
|-------------------------------------|--------------|-------------|---------------|--------------------|
| <b>Intercept</b>                    |              |             |               |                    |
| <i>Females</i>                      | <b>-2.1</b>  | <b>0.22</b> | <b>-9.37</b>  | <b>&lt; 0.0001</b> |
| <i>Males</i>                        | <b>-2.14</b> | <b>0.19</b> | <b>-11.01</b> | <b>&lt; 0.0001</b> |
| <b>Babysitting length</b>           | <b>0.24</b>  | <b>0.08</b> | <b>2.77</b>   | <b>0.0056</b>      |
| <b>Observation time</b>             | <b>-0.28</b> | <b>0.08</b> | <b>-3.4</b>   | <b>0.0007</b>      |
| Litter size                         | 0.015        | 0.05        | 0.32          | 0.75               |
| Mixed Litter?                       | -0.04        | 0.12        | -0.31         | 0.76               |
| Sex (M)                             | -0.03        | 0.27        | -0.13         | 0.9                |
| Age                                 |              |             |               |                    |
| <i>Females</i>                      | 0.13         | 0.17        |               |                    |
| <i>Males</i>                        | 0.4          | 0.19        |               |                    |
| Foraging success                    | -0.05        | 0.05        | -0.99         | 0.32               |
| Mass                                |              |             |               |                    |
| <i>Females</i>                      | -0.32        | 0.12        |               |                    |
| <i>Males</i>                        | -0.098       | 0.14        |               |                    |
| <b>Group size</b>                   |              |             |               |                    |
| <i>Females</i>                      | <b>-0.35</b> | <b>0.09</b> | <b>-3.97</b>  | <b>&lt; 0.0001</b> |
| <i>Males</i>                        | <b>-0.27</b> | <b>0.08</b> | <b>-3.28</b>  | <b>0.001</b>       |
| Treatment (Control)                 |              |             |               |                    |
| <i>Females</i>                      | -0.67        | 0.31        |               |                    |
| <i>Males</i>                        | -0.12        | 0.28        |               |                    |
| Treatment (None)                    |              |             |               |                    |
| <i>Females</i>                      | -0.06        | 0.23        |               |                    |
| <i>Males</i>                        | -0.16        | 0.18        |               |                    |
| Foraging success x Mass             | 0.036        | 0.06        | 0.57          | 0.57               |
| <b>Age x Mass</b>                   |              |             |               |                    |
| <i>Females</i>                      | <b>-0.47</b> | <b>0.09</b> | <b>-5.08</b>  | <b>&lt; 0.0001</b> |
| <i>Males</i>                        | <b>-0.29</b> | <b>0.08</b> | <b>-3.79</b>  | <b>0.0001</b>      |
| Age x Sex (M)                       | 0.28         | 0.23        | 1.18          | 0.24               |
| Mass x Sex (M)                      | 0.22         | 0.17        | 1.26          | 0.21               |
| Group size x Sex (M)                | 0.07         | 0.1         | 0.77          | 0.44               |
| Treatment (Control) x Sex (M)       | 0.55         | 0.42        | 1.31          | 0.19               |
| Treatment (None) x Sex (M)          | -0.1         | 0.28        | -0.36         | 0.72               |
| <b>Age x Treatment (Control)</b>    |              |             |               |                    |
| <i>Females</i>                      | <b>-0.62</b> | <b>0.21</b> | <b>-2.89</b>  | <b>0.0039</b>      |
| <i>Males</i>                        | -0.52        | 0.27        | -1.92         | 0.055              |
| Age x Treatment (None)              |              |             |               |                    |
| <i>Females</i>                      | 0.34         | 0.18        | 1.88          | 0.059              |
| <i>Males</i>                        | -0.006       | 0.16        | -0.03         | 0.97               |
| Age x Mass x Sex                    | 0.18         | 0.12        | 1.5           | 0.13               |
| Age x Treatment (Control) x Sex (M) | 0.09         | 0.34        | 0.28          | 0.78               |
| Age x Treatment (None) x Sex (M)    | -0.34        | 0.24        | -1.45         | 0.14               |

835 Data used in these analyses were 182 observations of relative babysitting contributions to 28  
 836 litters produced in 9 groups across 3 years recorded from 105 subordinate meerkats.

837  
 838

839 **Table 5. Effect of dominant female treatments on relative pup feeding contributions.** Data  
 840 are from a generalized linear mixed-effects model where the response variable is the proportion  
 841 of pup feeds exhibited by the subordinate meerkat relative to the total pup feeds the litter  
 842 received. The model contained random intercept terms for individual ( $\sigma^2 = 0.000$ ), litter nested  
 843 within group ( $\sigma^2 = 0.2$ ), year ( $\sigma^2 = 0.08$ ), and an observational level random intercept term to  
 844 control for overdispersion ( $\sigma^2 = 0.19$ ). If fixed effects by themselves were involved in significant  
 845 higher order interactions with other variables, only parameter estimates are shown.

| Fixed Effect                        | b            | SE          | z             | P-value           |
|-------------------------------------|--------------|-------------|---------------|-------------------|
| <b>Intercept</b>                    |              |             |               |                   |
| <i>Females</i>                      | <b>-2.27</b> | <b>0.28</b> | <b>-8.2</b>   | <b>&lt;0.0001</b> |
| <i>Males</i>                        | <b>-2.66</b> | <b>0.25</b> | <b>-10.45</b> | <b>&lt;0.0001</b> |
| <b>Observation time</b>             | <b>0.59</b>  | <b>0.06</b> | <b>9.41</b>   | <b>&lt;0.0001</b> |
| Litter size                         | -0.055       | 0.1         | -0.55         | 0.58              |
| Mixed litter (Y)                    | -0.03        | 0.29        | -0.1          | 0.92              |
| Sex (M)                             | -0.39        | 0.2         |               |                   |
| Age                                 |              |             |               |                   |
| <i>Females</i>                      | -0.37        | 0.16        |               |                   |
| <i>Males</i>                        | 0.29         | 0.14        |               |                   |
| <b>Foraging success</b>             | <b>0.14</b>  | <b>0.06</b> | <b>2.12</b>   | <b>0.033</b>      |
| Mass                                |              |             |               |                   |
| <i>Females</i>                      | 0.1          | 0.11        |               |                   |
| <i>Males</i>                        | -0.37        | 0.11        |               |                   |
| <b>Group size</b>                   |              |             |               |                   |
| <i>Females</i>                      | <b>-0.48</b> | <b>0.13</b> | <b>-3.57</b>  | <b>0.0003</b>     |
| <i>Males</i>                        | <b>-0.32</b> | <b>0.13</b> | <b>-2.46</b>  | <b>0.014</b>      |
| <b>Treatment (Control)</b>          |              |             |               |                   |
| <i>Females</i>                      | <b>-0.73</b> | <b>0.23</b> | <b>-3.12</b>  | <b>0.0018</b>     |
| <i>Males</i>                        | -0.24        | 0.21        | -1.14         | 0.25              |
| <b>Treatment (None)</b>             |              |             |               |                   |
| <i>Females</i>                      | <b>-0.64</b> | <b>0.18</b> | <b>-3.49</b>  | <b>0.0005</b>     |
| <i>Males</i>                        | -0.14        | 0.13        | -1.03         | 0.3               |
| Foraging success x Mass             | 0.06         | 0.06        | 0.97          | 0.33              |
| <b>Age x Mass</b>                   |              |             |               |                   |
| <i>Females</i>                      | -0.04        | 0.07        | -0.62         | 0.54              |
| <i>Males</i>                        | <b>-0.19</b> | <b>0.07</b> | <b>-2.68</b>  | <b>0.007</b>      |
| <b>Age x Sex (M)</b>                | <b>0.66</b>  | <b>0.19</b> | <b>3.49</b>   | <b>0.00048</b>    |
| <b>Mass x Sex (M)</b>               | <b>-0.47</b> | <b>0.13</b> | <b>-3.63</b>  | <b>0.0003</b>     |
| Group size x Sex (M)                | 0.16         | 0.08        | 1.89          | 0.059             |
| Treatment (Control) x Sex (M)       | 0.49         | 0.31        | 1.58          | 0.11              |
| <b>Treatment (None) x Sex (M)</b>   | <b>0.5</b>   | <b>0.22</b> | <b>2.23</b>   | <b>0.023</b>      |
| Age x Treatment (Control)           |              |             |               |                   |
| <i>Females</i>                      | -0.11        | 0.22        | -0.5          | 0.61              |
| <i>Males</i>                        | 0.03         | 0.29        | 0.11          | 0.91              |
| Age x Treatment (None)              |              |             |               |                   |
| <i>Females</i>                      | 0.17         | 0.16        | 1.03          | 0.3               |
| <i>Males</i>                        | -0.02        | 0.14        | -0.12         | 0.9               |
| Age x Mass x Sex                    | -0.14        | 0.09        | -1.51         | 0.13              |
| Age x Treatment (Control) x Sex (M) | 0.14         | 0.34        | 0.42          | 0.67              |
| Age x Treatment (None) x Sex (M)    | -0.19        | 0.21        | -0.91         | 0.36              |

846 Data used in these analyses were 192 observations of relative pup feeding contributions to 26  
 847 litters produced in 7 groups across 3 years recorded from 101 subordinate meerkats.  
 848

849 **Table 6. Effect of dominant female treatments on plasma cortisol concentrations.** Data are  
 850 from a linear mixed-effects model where the response variable is plasma cortisol concentrations  
 851 (ln transformed) of the subordinate meerkat. The model contained random intercept terms for  
 852 individual nested within their birth litter ( $\sigma^2 = 0.034$ ), and capture group ( $\sigma^2 = 0.000$ ). If fixed  
 853 effects by themselves were involved in significant higher order interactions with other variables,  
 854 only parameter estimates are shown.

| Fixed Effect                                 | b            | SE          | t            | df         | P-value           |
|----------------------------------------------|--------------|-------------|--------------|------------|-------------------|
| <b>Intercept</b>                             |              |             |              |            |                   |
| <i>Females</i>                               | <b>3.18</b>  | <b>0.29</b> | <b>11.31</b> | <b>128</b> | <b>&lt;0.0001</b> |
| <i>Males</i>                                 | <b>3.37</b>  | <b>0.25</b> | <b>13.37</b> | <b>113</b> | <b>&lt;0.0001</b> |
| <b>Sampling time</b>                         | <b>1.16</b>  | <b>0.10</b> | <b>11.95</b> | <b>259</b> | <b>&lt;0.0001</b> |
| <b>Sampling time<sup>2</sup></b>             | <b>-0.24</b> | <b>0.03</b> | <b>-7.24</b> | <b>269</b> | <b>&lt;0.0001</b> |
| Time of day                                  | -0.2         | 0.14        | -1.38        | 276        | 0.17              |
| Sample year (2015)                           | 0.41         | 0.24        | 1.72         | 228        | 0.09              |
| Sex (M)                                      | 0.2          | 0.2         | 0.97         | 39         | 0.34              |
| Age                                          |              |             |              |            |                   |
| <i>Females</i>                               | -0.24        | 0.18        |              |            |                   |
| <i>Males</i>                                 | -0.01        | 0.14        |              |            |                   |
| Foraging success                             |              |             |              |            |                   |
| <i>Females</i>                               | 0.13         | 0.11        | -1.22        | 231        | 0.22              |
| <i>Males</i>                                 | -0.15        | 0.1         | -1.42        | 269        | 0.16              |
| Group size                                   | 0.07         | 0.11        | 0.62         | 242        | 0.54              |
| Group size <sup>2</sup>                      | 0.05         | 0.08        | 0.63         | 211        | 0.53              |
| Pups in group                                | -0.31        | 0.18        | -1.79        | 276        | 0.075             |
| <b>Group sex ratio</b>                       | <b>0.2</b>   | <b>0.08</b> | <b>2.53</b>  | <b>180</b> | <b>0.01</b>       |
| Relatedness                                  | -0.09        | 0.18        | -0.5         | 40         | 0.62              |
| Weather (PC1)                                | -0.08        | 0.1         | -0.75        | 276        | 0.45              |
| Treatment (Cortisol)                         |              |             |              |            |                   |
| <i>Females</i>                               | -0.02        | 0.24        |              |            |                   |
| <i>Males</i>                                 | -0.32        | 0.19        |              |            |                   |
| Sex (M) x Age                                | 0.22         | 0.22        | 1.04         | 272        | 0.3               |
| Sex (M) x Foraging success                   | -0.013       | 0.14        | -0.09        | 257        | 0.93              |
| Sex (M) x Treatment (Cortisol)               | -0.3         | 0.3         | -1.01        | 35         | 0.32              |
| <b>Age x Treatment (Cortisol)</b>            |              |             |              |            |                   |
| <i>Females</i>                               | -0.42        | 0.24        | -1.76        | 276        | 0.08              |
| <i>Males</i>                                 | <b>-0.5</b>  | <b>0.19</b> | <b>-2.68</b> | <b>274</b> | <b>0.008</b>      |
| Group size x Pups Present (Yes)              | -0.05        | 0.15        | -0.36        | 216        | 0.72              |
| Group size <sup>2</sup> x Pups Present (Yes) | 0.07         | 0.12        | 0.6          | 263        | 0.55              |
| Group size x Weather (PC1)                   | -0.02        | 0.08        | -0.30        | 273        | 0.76              |
| Age x Sex (M) x Treatment (Cortisol)         | -0.08        | 0.31        | -0.26        | 275        | 0.8               |

855 Data used in these analyses were 299 measures of plasma cortisol concentrations from 49  
 856 subordinate meerkats produced in 14 litters from 10 different groups. Reference levels (intercept) for  
 857 “Sex” was female, “Pups in group” was Yes, and for Relatedness was “No parent was dominant”.  
 858

859 **Table 7. Effect of dominant female treatments on faecal glucocorticoid metabolite (fGCM)**  
 860 **concentrations.** Data are from a linear mixed-effects model where the response variable fGCM  
 861 concentrations (ln+1 transformed) of the subordinate meerkat. The model contained random  
 862 intercept terms for individual nested within their birth litter ( $\sigma^2 = 0.094$ ) and collection group ( $\sigma^2$   
 863 = 0.000). If fixed effects by themselves were involved in significant higher order interactions  
 864 with other variables, only parameter estimates are shown.

| <b>Fixed Effect</b>                          | <b>b</b>     | <b>SE</b>   | <b>t</b>     | <b>df</b>  | <b>P-value</b>    |
|----------------------------------------------|--------------|-------------|--------------|------------|-------------------|
| <b>Intercept</b>                             |              |             |              |            |                   |
| <i>Females</i>                               | <b>5.4</b>   | <b>0.25</b> | <b>21.36</b> | <b>50</b>  | <b>&lt;0.0001</b> |
| <i>Males</i>                                 | <b>5.33</b>  | <b>0.23</b> | <b>23.4</b>  | <b>23</b>  | <b>&lt;0.0001</b> |
| <b>Time of day</b>                           | <b>-0.14</b> | <b>0.04</b> | <b>-3.29</b> | <b>516</b> | <b>0.001</b>      |
| Sample year (2015)                           | 0.07         | 0.17        | 0.43         | 120        | 0.67              |
| Sex (M)                                      | -0.06        | 0.2         | -0.31        | 22         | 0.76              |
| Age                                          |              |             |              |            |                   |
| <i>Females</i>                               | 0.48         | 0.16        |              |            |                   |
| <i>Males</i>                                 | 0.06         | 0.1         |              |            |                   |
| Foraging success                             |              |             |              |            |                   |
| <i>Females</i>                               | 0.16         | 0.13        | 1.29         | 355        | 0.2               |
| <i>Males</i>                                 | 0.04         | 0.06        | 0.81         | 520        | 0.42              |
| <b>Group size</b>                            | <b>0.41</b>  | <b>0.12</b> | <b>3.52</b>  | <b>96</b>  | <b>0.0007</b>     |
| Group size <sup>2</sup>                      | -0.05        | 0.11        | -0.78        | 267        | 0.43              |
| Pups in group                                | -0.13        | 0.16        | -0.78        | 267        | 0.43              |
| <b>Group sex ratio</b>                       | <b>0.16</b>  | <b>0.07</b> | <b>2.27</b>  | <b>158</b> | <b>0.024</b>      |
| Relatedness                                  | 0.28         | 0.25        | 1.1          | 14         | 0.29              |
| Weather (PC1)                                | 0.09         | 0.07        | 1.4          | 203        | 0.16              |
| Treatment (Cortisol)                         |              |             |              |            |                   |
| <i>Females</i>                               | -0.12        | 0.29        |              |            |                   |
| <i>Males</i>                                 | -0.03        | 0.24        |              |            |                   |
| <b>Sex (M) x Age</b>                         | <b>-0.42</b> | <b>0.17</b> | <b>-2.47</b> | <b>221</b> | <b>0.014</b>      |
| Sex (M) x Foraging success                   | -0.12        | 0.13        | -0.87        | 375        | 0.38              |
| Sex (M) x Treatment (Cortisol)               | 0.1          | 0.33        | 0.29         | 18         | 0.77              |
| <b>Age x Treatment (Cortisol)</b>            |              |             |              |            |                   |
| <i>Females</i>                               | <b>-0.63</b> | <b>0.22</b> | <b>-2.9</b>  | <b>447</b> | <b>0.004</b>      |
| <i>Males</i>                                 | -0.1         | 0.14        | -0.69        | 491        | 0.49              |
| Group size x Pups Present (Yes)              | -0.17        | 0.12        | -1.46        | 216        | 0.14              |
| Group size <sup>2</sup> x Pups Present (Yes) | 0.11         | 0.12        | 456          | 0.97       | 0.33              |
| Group size x Weather (PC1)                   | 0.04         | 0.05        | 0.69         | 129        | 0.49              |
| <b>Age x Sex (M) x Treatment (Cortisol)</b>  | <b>0.53</b>  | <b>0.25</b> | <b>2.15</b>  | <b>413</b> | <b>0.032</b>      |

865 Data used in these analyses were 542 faecal samples (n= 355 from controls, n = 187 from cortisol  
 866 treated litters) from 34 subordinate meerkats (control: n = 12 females, n = 11 males; cortisol-treated: n = 5  
 867 females, n = 6 males) produced in 10 litters from 7 different groups. Reference levels (intercept) for  
 868 “Sex” was female, “Pups in group” was Yes, and for Relatedness was “No parent was dominant”.

869  
 870  
 871  
 872  
 873  
 874  
 875
